# Supplementary material for: Robust cone-mediated signaling persists late into rod photoreceptor degeneration
Source: eLife. 2022 Aug 30;11:e80271. doi: 10.7554/eLife.80271 (PMC9560159; doi:10.7554/eLife.80271)
Supplement: Figure 1—source data 1. [file elife-80271-fig1-data1.xlsx]

## Sheet: Sheet1
File	Months	Cone body count	Cone outer segment count	Cone Fiber count	Average cone count	Total Avg Cones	Length of outer nuclear layer	area(um^2)	Std Dev	Nuclei/um	% cones	# rods	% rods	Total Avg rods	St Dev rod	% of WT cones	St Dev Cones %	SEM Con %	% of WT rods	St Dev Rod %	SEM Rod %	% of WT PRs
1249192R2RE_WT_60xz_ms2048	WT	40	46	40	42		84	17640		1822.31	2.30476	1780.31	97.6952
2020-12-16-0_WT_RE_60xz004	WT	41	45	45	43.6667		54.8821	11525.2		1190.62	3.66754	1146.96	96.3325
1249192R2RE_WT_60xz_ms2048_slide3	WT	41	46	39	42		84.3347	17710.3		1829.58	2.29561	1787.58	97.7044
AVG						42.5556			2.78687					1571.62	367.782
1274991L2LE_1M_60xz_2024	1M	36	37	45	39.3333		54.621	11470.4		1184.96	3.31938	1145.63	96.6806			104.656			73.3315
1274991L2LE_1M_60xz001	1M	38	46	47	43.6667		57.164	12004.4		1240.13	3.52114	1196.46	96.4789			116.186			76.5855
AVG						41.5			5.00999					1171.04	35.9463	110.421	8.15289	5.76497	74.9585	2.30092	1.627	75.7916
20190314_contra_cng_3m_20191115_60x_5007	3M	41	44	50	45		29.2983	6152.65		635.604	7.07987	590.604	92.9201			105.744			37.5794
0190314_contra_cng_3m_20191115_60x_Z065	3M	29	26	38	31		25.393	5332.52		550.881	5.62735	519.881	94.3726			72.846			33.0794
2021-01-07-0_3M_RE_60xz002	3M	42	45	47	44.6667		25.577	5371.17		554.873	8.04989	510.206	91.9501			104.961			32.4638
Avg						40.2222			8.02773					540.23	43.8925	94.517	18.7717	10.8379	34.3742	2.79283	1.61244	35.9598
1257838_NP_RE_5M_CNG_K_20191018_60x_Z038	5M	26	34	31	30.3333		24.4212	5128.45		529.799	5.72545	499.465	94.2746			71.2794			31.7804
1257838_np_re_5m_cng_20191018_60x_5003	5M	44	45	44	44.3333		23.0125	4832.63		499.238	8.8802	454.905	91.1198			104.178			28.945
1257838_np_re_5m_cng_20191018_60x_5004	5M	34	37	41	37.3333		22.6638	4759.39		491.673	7.59312	454.34	92.4069			87.7285			28.9091
1257838_np_re_5m_cng_20191018_60x_5010		43	42	47	44		20.3059	4264.24		440.521	9.98817	396.521	90.0118			103.394			25.2302
1257838_NP_RE_5M_CNG_KO_20191018_60x_Z034	5M	24	27	22	24.3333		21.4494	4504.37		465.327	5.22929	440.994	94.7707			57.1802			28.0599
AVG						36.0667			8.4301					449.245	36.8373	84.752	20.4662	9.15277	28.5849	2.34391	1.04823	30.0657
2020-05-19-0_7M_60xz_2041	7M	31			31		4.72139	991.493		102.427	30.2655	71.4269	69.7345			72.846			4.54481
2020-05-19-0_7M_60xz006	7M	21			21		6.65817	1398.22		144.444	14.5385	123.444	85.4615			49.3473			7.85458
2020-12-17-0_7M_RE_60xz007		31			31		3.29929	692.852		71.5756	43.3109	40.5756	56.6891			72.846			2.58177
Avg						27.6667			5.7735					78.4821	41.8822	65.0131	13.567	7.8329	4.99372	2.66491	1.53859	6.57605
Standards
Width of image = 210
Nuclei area = 9.68

## Sheet: nuclei
File Name	diameter of nuclei
STD_1249192R2RE_WT_20xz_ms.nd2 - C=0	3.69952
STD_1249192R2RE_WT_20xz_ms.nd2 - C=0	3.69952
STD_1249192R2RE_WT_20xz_ms.nd2 - C=0	4.13619
STD_1249192R2RE_WT_20xz_ms.nd2 - C=0	3.59529
STD_1249192R2RE_WT_60xz_ms2048.nd2 - C=0	4.40818
STD_1249192R2RE_WT_60xz_ms2048.nd2 - C=0	2.97394
STD_1249192R2RE_WT_60xz_ms2048.nd2 - C=0	3.64815
STD_1249192R2RE_WT_60xz_ms2048.nd2 - C=0	3.32497
STD_1249152_R2_RE_20191007_60x_5011_large.nd2 - C=0	2.62039
STD_1249152_R2_RE_20191007_60x_5011_large.nd2 - C=0	2.81768
STD_1249152_R2_RE_20191007_60x_5011_large.nd2 - C=0	3.07966
STD_1249152_R2_RE_20191007_60x_5011_large.nd2 - C=0	5.59716
STD_1249152_R2_RE_20191007_60x_5011_large.nd2 - C=0	2.34375
STD_2021-01-22_Abtest1_60xzDAPI.tif	3.22763
STD_2021-01-22_Abtest1_60xzDAPI.tif	3.49943
STD_2021-01-22_Abtest1_60xzDAPI.tif	4.74273
AVG	3.58839
