# Supplementary material for: Robust cone-mediated signaling persists late into rod photoreceptor degeneration
Source: eLife. 2022 Aug 30;11:e80271. doi: 10.7554/eLife.80271 (PMC9560159; doi:10.7554/eLife.80271)
Supplement: Figure 4—source data 1. [file elife-80271-fig4-data1.csv]

spkr	age	lightlevel	contrast	.
1.258875769	0	mesopic	2
1.232628159	0	mesopic	2
1.14833214	0	mesopic	2
1.167132544	0	mesopic	2
1.335184672	0	mesopic	2
1.300897423	0	mesopic	2
1.365632614	0	mesopic	2
1.355157225	0	mesopic	2
1.184865894	0	mesopic	2
1.525203555	0	mesopic	2
1.157406216	0	mesopic	2
1.240534794	0	mesopic	2
1.349725419	0	mesopic	2
1.440806001	0	mesopic	2
1.222302671	0	mesopic	2
1.243127656	0	mesopic	2
1.210552077	0	mesopic	2
1.350521542	0	mesopic	2
1.362672574	0	mesopic	2
1.16254617	0	mesopic	2
1.182349443	0	mesopic	2
1.234872771	0	mesopic	2
1.401329917	0	mesopic	2
1.101534583	0	mesopic	2
1.207211198	0	mesopic	2
1.264852569	0	mesopic	2
1.20422261	0	mesopic	2
1.343262202	0	mesopic	2
1.178474799	0	mesopic	2
1.362127357	0	mesopic	2
1.195019703	0	mesopic	2
1.327847046	0	mesopic	2
1.023433175	0	mesopic	2
1.367106928	0	mesopic	2
1.209765271	0	mesopic	2
1.253476761	0	mesopic	2
1.229702513	0	mesopic	2
1.102485607	0	mesopic	2
1.194255927	0	mesopic	2
1.388597988	0	mesopic	2
1.383257802	0	mesopic	2
1.222429647	0	mesopic	2
0.94040596	0	mesopic	2
1.573793254	0	mesopic	2
1.256569748	0	mesopic	2
1.256454483	0	mesopic	2
1.238622483	0	mesopic	2
1.251192086	0	mesopic	2
1.26854837	0	mesopic	2
1.302192589	0	mesopic	2
1.352567398	0	mesopic	2
1.24769663	0	mesopic	2
1.204185512	0	mesopic	2
1.157038284	0	mesopic	2
1.237504639	0	mesopic	2
1.369001504	0	mesopic	2
1.309202319	0	mesopic	2
1.430640288	0	mesopic	2
1.216785612	0	mesopic	2
1.345903888	0	mesopic	2
1.152821904	0	mesopic	2
1.092911316	0	mesopic	2
1.351287511	0	mesopic	2
1.379992	0	mesopic	2
1.276130833	0	mesopic	2
1.260157909	0	mesopic	2
0.94765468	0	mesopic	2
1.292825666	0	mesopic	2
1.195816897	0	mesopic	2
1.122896458	0	mesopic	2
1.310436672	0	mesopic	2
1.453631444	0	mesopic	2
1.282570815	0	mesopic	2
1.19254659	0	mesopic	2
1.347064829	0	mesopic	2
1.098314428	0	mesopic	2
1.115969478	0	mesopic	2
1.337284812	0	mesopic	2
1.278045056	0	mesopic	2
1.39710181	0	mesopic	2
1.173376197	0	mesopic	2
1.258639663	0	mesopic	2
1.282503973	0	mesopic	2
1.223277973	0	mesopic	2
1.419575861	0	mesopic	2
1.194134043	0	mesopic	2
1.172140648	0	mesopic	2
1.211044726	0	mesopic	2
1.345186144	0	mesopic	2
1.110357564	0	mesopic	2
1.35473023	0	mesopic	2
1.059033844	0	mesopic	2
1.054812866	0	mesopic	2
1.216641934	0	mesopic	2
1.106202694	0	mesopic	2
1.111845437	0	mesopic	2
1.259958611	0	mesopic	2
1.224322784	0	mesopic	2
1.117251076	0	mesopic	2
1.270083502	0	mesopic	2
1.150984658	0	mesopic	2
1.216497473	0	mesopic	2
1.249335617	0	mesopic	2
1.186050946	0	mesopic	2
1.030799415	0	mesopic	2
1.098684009	0	mesopic	2
1.358302972	0	mesopic	2
1.273850607	0	mesopic	2
1.080988453	0	mesopic	2
1.255446214	0	mesopic	2
1.382798064	0	mesopic	2
1.094746521	0	mesopic	2
1.142786225	0	mesopic	2
1.49271968	0	mesopic	2
1.248720999	0	mesopic	2
1.102243567	0	mesopic	2
1.201297139	0	mesopic	2
1.218936748	0	mesopic	2
1.377393954	0	mesopic	2
1.291967077	0	mesopic	2
1.238037848	0	mesopic	2
1.338383146	0	mesopic	2
1.166752165	0	mesopic	2
1.333017469	0	mesopic	2
1.15337685	0	mesopic	2
1.241528299	0	mesopic	2
1.361431395	0	mesopic	2
1.204587778	0	mesopic	2
1.072292722	0	mesopic	2
1.04837217	0	mesopic	2
1.115025366	0	mesopic	2
1.274822342	0	mesopic	2
1.102272682	0	mesopic	2
1.480554726	0	mesopic	2
1.352362417	0	mesopic	2
1.165530512	0	mesopic	2
1.329379765	0	mesopic	2
1.333153514	0	mesopic	2
0.991035825	0	mesopic	2
1.196042868	0	mesopic	2
1.280297931	0	mesopic	2
1.120182546	0	mesopic	2
1.28741852	0	mesopic	2
1.421899559	0	mesopic	2
1.182997602	0	mesopic	2
1.238412698	0	mesopic	2
1.06792699	0	mesopic	2
1.206340727	0	mesopic	2
1.256650603	0	mesopic	2
1.181708334	0	mesopic	2
0.943508367	0	mesopic	2
1.117110938	0	mesopic	2
1.316417375	0	mesopic	2
1.134578608	0	mesopic	2
1.162366653	0	mesopic	2
1.255989871	0	mesopic	2
1.303933256	0	mesopic	2
1.278570715	0	mesopic	2
0.999885651	0	mesopic	2
1.22356789	0	mesopic	2
1.445002465	0	mesopic	2
1.05379541	0	mesopic	2
1.232613956	0	mesopic	2
1.323000397	0	mesopic	2
1.212516881	0	mesopic	2
1.196334896	0	mesopic	2
1.051609581	0	mesopic	2
1.257378553	0	mesopic	2
1.270639513	0	mesopic	2
1.191401511	0	mesopic	2
0.907564787	0	mesopic	2
1.177198633	0	mesopic	2
1.26536673	0	mesopic	2
1.218808523	0	mesopic	2
1.172044682	0	mesopic	2
1.555430231	0	mesopic	2
1.256595322	0	mesopic	2
1.300318159	0	mesopic	2
1.156261087	0	mesopic	2
1.25586004	0	mesopic	2
1.35808485	0	mesopic	2
1.075869854	0	mesopic	2
1.205259516	0	mesopic	2
1.008949159	0	mesopic	2
1.230587389	0	mesopic	2
1.120277471	0	mesopic	2
1.568177864	0	mesopic	2
1.127923635	0	mesopic	2
1.239722265	0	mesopic	2
1.181596902	0	mesopic	2
1.255905286	0	mesopic	2
1.251496655	0	mesopic	2
1.331215685	0	mesopic	2
1.212728339	0	mesopic	2
1.228495148	0	mesopic	2
1.36257153	0	mesopic	2
1.024362723	0	mesopic	2
1.298051031	0	mesopic	2
1.386491871	0	mesopic	2
1.21467936	0	mesopic	2
1.33335311	0	mesopic	2
1.168552262	0	mesopic	2
1.250478593	0	mesopic	2
1.153260901	0	mesopic	2
1.190029657	0	mesopic	2
1.433431108	0	mesopic	2
1.231465908	0	mesopic	2
1.240138989	0	mesopic	2
1.233423605	0	mesopic	2
1.195148687	0	mesopic	2
1.243489279	0	mesopic	2
1.386226418	0	mesopic	2
1.247924261	0	mesopic	2
1.4446598	0	mesopic	2
1.119320695	0	mesopic	2
1.229208101	0	mesopic	2
1.264283634	0	mesopic	2
1.292227212	0	mesopic	2
1.311614936	0	mesopic	2
1.242699321	0	mesopic	2
1.28446516	0	mesopic	2
1.24124017	0	mesopic	2
1.109403251	0	mesopic	2
1.310971333	0	mesopic	2
1.094401053	0	mesopic	2
1.144851772	0	mesopic	2
1.252271927	0	mesopic	2
1.232433365	0	mesopic	2
1.145671555	0	mesopic	2
1.257213878	0	mesopic	2
1.151299795	0	mesopic	2
1.330494019	0	mesopic	2
1.100684464	0	mesopic	2
1.232114401	0	mesopic	2
1.416925482	0	mesopic	2
1.176846017	0	mesopic	2
1.296886243	0	mesopic	2
1.186125359	0	mesopic	2
1.282553502	0	mesopic	2
1.278894344	0	mesopic	2
1.299129463	0	mesopic	2
1.044860328	0	mesopic	2
1.154126481	0	mesopic	2
0.954477127	0	mesopic	2
1.244637984	0	mesopic	2
1.131391089	0	mesopic	2
1.207064446	0	mesopic	2
1.220495784	0	mesopic	2
1.264336561	0	mesopic	2
1.128055746	0	mesopic	2
1.353295268	0	mesopic	2
0.923955177	0	mesopic	2
1.246161827	0	mesopic	2
1.327253905	0	mesopic	2
1.272307263	0	mesopic	2
1.374013823	0	mesopic	2
1.309913386	0	mesopic	2
1.234118479	0	mesopic	2
1.142054619	0	mesopic	2
1.170578145	0	mesopic	2
1.469449873	0	mesopic	2
1.383786068	0	mesopic	2
1.224735446	0	mesopic	2
1.140193585	0	mesopic	2
1.084179037	0	mesopic	2
1.384589266	0	mesopic	2
1.2646657	0	mesopic	2
1.234186812	0	mesopic	2
1.25214876	0	mesopic	2
1.370452324	0	mesopic	2
1.284333021	0	mesopic	2
1.38206228	0	mesopic	2
1.243530854	0	mesopic	2
1.237266188	0	mesopic	2
1.24772643	0	mesopic	2
1.158769233	0	mesopic	2
1.105038879	0	mesopic	2
1.360632355	0	mesopic	2
1.098103032	0	mesopic	2
1.295680955	0	mesopic	2
1.349640249	0	mesopic	2
1.387898441	0	mesopic	2
0.933842082	0	mesopic	2
1.386299476	0	mesopic	2
1.225200521	0	mesopic	2
1.188717229	0	mesopic	2
1.089800738	0	mesopic	2
1.20472592	0	mesopic	2
1.438849548	0	mesopic	2
1.38994821	0	mesopic	2
1.061192562	0	mesopic	2
1.083993667	0	mesopic	2
1.387365367	0	mesopic	2
1.376939982	0	mesopic	2
1.314623638	0	mesopic	2
1.017101728	0	mesopic	2
1.097029321	0	mesopic	2
1.375591111	0	mesopic	2
1.200323302	0	mesopic	2
1.239429907	0	mesopic	2
1.206612381	0	mesopic	2
1.140199333	0	mesopic	2
1.282453809	0	mesopic	2
1.217666571	0	mesopic	2
1.154670278	0	mesopic	2
1.091188573	0	mesopic	2
1.35536116	0	mesopic	2
1.524149802	0	mesopic	2
1.099792506	0	mesopic	2
1.356540084	0	mesopic	2
1.35118059	0	mesopic	2
1.280423846	0	mesopic	2
1.241467461	0	mesopic	2
1.31226162	0	mesopic	2
1.170443831	0	mesopic	2
1.238986723	0	mesopic	2
1.165385992	0	mesopic	2
1.369742347	0	mesopic	2
1.28210964	0	mesopic	2
1.233232526	0	mesopic	2
1.261681374	0	mesopic	2
1.241130722	0	mesopic	2
1.193019753	0	mesopic	2
1.328862826	0	mesopic	2
1.276593017	0	mesopic	2
1.299422169	0	mesopic	2
1.29261832	0	mesopic	2
1.347440674	0	mesopic	2
1.076143241	0	mesopic	2
1.301826519	0	mesopic	2
1.176189205	0	mesopic	2
1.357182708	0	mesopic	2
1.342128488	0	mesopic	2
1.323651219	0	mesopic	2
1.222435262	0	mesopic	2
1.106362037	0	mesopic	2
1.291013201	0	mesopic	2
1.161534681	0	mesopic	2
1.172133206	0	mesopic	2
1.204295501	0	mesopic	2
1.153122741	0	mesopic	2
1.258021041	0	mesopic	2
1.320012633	0	mesopic	2
1.331767005	0	mesopic	2
1.214896297	0	mesopic	2
1.184770266	0	mesopic	2
1.239603271	0	mesopic	2
1.285729851	0	mesopic	2
1.268122274	0	mesopic	2
1.182832895	0	mesopic	2
1.350850049	0	mesopic	2
1.434594109	0	mesopic	2
1.222364986	0	mesopic	2
1.348293991	0	mesopic	2
1.220327761	0	mesopic	2
1.210972878	0	mesopic	2
1.23147095	0	mesopic	2
1.239147764	0	mesopic	2
1.019790013	0	mesopic	2
1.259357526	0	mesopic	2
1.324289862	0	mesopic	2
1.154705659	0	mesopic	2
1.336245549	0	mesopic	2
1.279804567	0	mesopic	2
1.22902462	0	mesopic	2
1.285408748	0	mesopic	2
1.384269102	0	mesopic	2
1.192913755	0	mesopic	2
1.18869702	0	mesopic	2
1.167205296	0	mesopic	2
1.046646494	0	mesopic	2
1.3798827	0	mesopic	2
1.241510102	0	mesopic	2
1.269884141	0	mesopic	2
1.031245402	0	mesopic	2
1.307061201	0	mesopic	2
1.281281179	0	mesopic	2
1.124955695	0	mesopic	2
1.388622904	0	mesopic	2
1.29808141	0	mesopic	2
1.286564395	0	mesopic	2
1.288412899	0	mesopic	2
1.147879704	0	mesopic	2
1.202842388	0	mesopic	2
1.278054996	0	mesopic	2
1.151071335	0	mesopic	2
1.362008275	0	mesopic	2
1.26064046	0	mesopic	2
1.242191053	0	mesopic	2
1.314933561	0	mesopic	2
1.374480647	0	mesopic	2
1.121102446	0	mesopic	2
1.05873272	0	mesopic	2
1.258925585	0	mesopic	2
1.19556938	0	mesopic	2
1.123629673	0	mesopic	2
1.208311742	0	mesopic	2
1.272499117	0	mesopic	2
1.417749553	0	mesopic	2
1.341179777	0	mesopic	2
1.405234782	0	mesopic	2
1.412393249	0	mesopic	2
1.240644453	0	mesopic	2
1.285915077	0	mesopic	2
1.269971125	0	mesopic	2
1.428617101	0	mesopic	2
1.270504718	0	mesopic	2
1.388585318	0	mesopic	2
1.16247183	0	mesopic	2
0.969750043	0	mesopic	2
1.239393416	0	mesopic	2
1.280333458	0	mesopic	2
1.263229074	0	mesopic	2
1.182046911	0	mesopic	2
1.156330542	0	mesopic	2
1.409274213	0	mesopic	2
1.031822449	0	mesopic	2
1.260227429	0	mesopic	2
1.131660431	0	mesopic	2
1.196654628	0	mesopic	2
1.251967954	0	mesopic	2
1.101713974	0	mesopic	2
1.460314544	0	mesopic	2
1.273617372	0	mesopic	2
1.194424514	0	mesopic	2
1.223487996	0	mesopic	2
1.171626978	0	mesopic	2
1.296728302	0	mesopic	2
1.316729214	0	mesopic	2
1.072646557	0	mesopic	2
1.228148139	0	mesopic	2
1.365102347	0	mesopic	2
1.232822058	0	mesopic	2
1.225652194	0	mesopic	2
1.339332254	0	mesopic	2
1.247631671	0	mesopic	2
1.456558911	0	mesopic	2
1.318444007	0	mesopic	2
1.41985545	0	mesopic	2
1.245432167	0	mesopic	2
1.146880236	0	mesopic	2
1.279190354	0	mesopic	2
1.352239226	0	mesopic	2
1.329394158	0	mesopic	2
1.296493915	0	mesopic	2
1.187850452	0	mesopic	2
1.254493755	0	mesopic	2
1.35340952	0	mesopic	2
1.25539492	0	mesopic	2
1.281606915	0	mesopic	2
1.192054487	0	mesopic	2
1.149961977	0	mesopic	2
1.253928545	0	mesopic	2
1.43848136	0	mesopic	2
1.214687728	0	mesopic	2
1.061738582	0	mesopic	2
1.340203034	0	mesopic	2
1.293167019	0	mesopic	2
1.21886223	0	mesopic	2
1.391306789	0	mesopic	2
1.280916223	0	mesopic	2
1.464701944	0	mesopic	2
1.093911114	0	mesopic	2
1.324090691	0	mesopic	2
1.335975775	0	mesopic	2
1.217646572	0	mesopic	2
1.191679212	0	mesopic	2
1.01738407	0	mesopic	2
1.182574375	0	mesopic	2
1.30978387	0	mesopic	2
1.07497134	0	mesopic	2
1.150600377	0	mesopic	2
1.270988247	0	mesopic	2
1.371069954	0	mesopic	2
1.444685139	0	mesopic	2
1.162929812	0	mesopic	2
1.119890137	0	mesopic	2
1.343707655	0	mesopic	2
1.363605182	0	mesopic	2
1.150733274	0	mesopic	2
1.365346924	0	mesopic	2
1.139583206	0	mesopic	2
1.399572257	0	mesopic	2
1.168079732	0	mesopic	2
1.120749715	0	mesopic	2
1.311121587	0	mesopic	2
0.999519048	0	mesopic	2
1.284757131	0	mesopic	2
1.22682592	0	mesopic	2
1.276079056	0	mesopic	2
1.274005662	0	mesopic	2
1.122841573	0	mesopic	2
1.339683309	0	mesopic	2
1.246340492	0	mesopic	2
1.451781838	0	mesopic	2
1.276061907	0	mesopic	2
1.190678007	0	mesopic	2
1.086587592	0	mesopic	2
1.182631956	0	mesopic	2
1.203701748	0	mesopic	2
1.31152394	0	mesopic	2
1.422714544	0	mesopic	2
1.231928478	0	mesopic	2
1.14416042	0	mesopic	2
1.343419101	0	mesopic	2
1.275076818	0	mesopic	2
1.090852066	0	mesopic	2
1.05445539	0	mesopic	2
1.531443359	0	mesopic	2
0.977777146	0	mesopic	2
1.145500563	0	mesopic	2
1.245463511	0	mesopic	2
1.252995323	0	mesopic	2
1.177991149	0	mesopic	2
1.211348612	0	mesopic	2
1.224991039	0	mesopic	2
1.094144623	0	mesopic	2
1.319173707	0	mesopic	2
1.271079138	0	mesopic	2
1.309414982	0	mesopic	2
1.124421948	0	mesopic	2
1.462012164	0	mesopic	2
1.299212442	0	mesopic	2
1.25653816	0	mesopic	2
1.383732133	0	mesopic	2
1.280754256	0	mesopic	2
1.305344855	0	mesopic	2
1.261595973	0	mesopic	2
1.412265226	0	mesopic	2
1.173221987	0	mesopic	2
1.167596933	0	mesopic	2
1.369521939	0	mesopic	2
1.233274057	0	mesopic	2
1.281786323	0	mesopic	2
1.251111972	0	mesopic	2
1.268295793	0	mesopic	2
1.197619913	0	mesopic	2
1.272252525	0	mesopic	2
1.131150962	0	mesopic	2
1.282537229	0	mesopic	2
1.397445445	0	mesopic	2
1.030780432	0	mesopic	2
1.242826512	0	mesopic	2
1.34763799	0	mesopic	2
1.253338349	0	mesopic	2
1.272758419	0	mesopic	2
1.338698664	0	mesopic	2
1.174351853	0	mesopic	2
1.218231029	0	mesopic	2
1.148354331	0	mesopic	2
1.179479936	0	mesopic	2
1.140026214	0	mesopic	2
1.47465292	0	mesopic	2
1.089495767	0	mesopic	2
1.21720078	0	mesopic	2
1.140334894	0	mesopic	2
1.142636471	0	mesopic	2
1.383273726	0	mesopic	2
1.113635931	0	mesopic	2
1.183705745	0	mesopic	2
1.268022688	0	mesopic	2
1.140775283	0	mesopic	2
1.329381954	0	mesopic	2
1.196001774	0	mesopic	2
1.237251451	0	mesopic	2
1.116893232	0	mesopic	2
1.212601072	0	mesopic	2
1.154221628	0	mesopic	2
1.197656074	0	mesopic	2
1.236788949	0	mesopic	2
1.547402221	0	mesopic	2
1.367605259	0	mesopic	2
1.166361296	0	mesopic	2
1.201877317	0	mesopic	2
1.165382804	0	mesopic	2
1.082680167	0	mesopic	2
1.347086137	0	mesopic	2
1.395221097	0	mesopic	2
1.112962844	0	mesopic	2
1.32675619	0	mesopic	2
1.177768064	0	mesopic	2
1.410802519	0	mesopic	2
1.290940703	0	mesopic	2
1.165255291	0	mesopic	2
1.251012405	0	mesopic	2
1.338412521	0	mesopic	2
1.276079479	0	mesopic	2
1.249429736	0	mesopic	2
1.088335995	0	mesopic	2
1.343877281	0	mesopic	2
1.294131905	0	mesopic	2
1.361630481	0	mesopic	2
1.156318587	0	mesopic	2
1.179942491	0	mesopic	2
1.22999159	0	mesopic	2
1.265558798	0	mesopic	2
1.32297935	0	mesopic	2
1.331043385	0	mesopic	2
1.069022408	0	mesopic	2
1.046108385	0	mesopic	2
1.519715229	0	mesopic	2
1.269907628	0	mesopic	2
1.169189547	0	mesopic	2
1.406068534	0	mesopic	2
1.007914227	0	mesopic	2
1.423681987	0	mesopic	2
1.309300205	0	mesopic	2
1.486483718	0	mesopic	2
1.353688094	0	mesopic	2
1.413352904	0	mesopic	2
1.346024626	0	mesopic	2
1.393601027	0	mesopic	2
1.378488937	0	mesopic	2
1.267563886	0	mesopic	2
1.206763646	0	mesopic	2
1.214987358	0	mesopic	2
1.258146981	0	mesopic	2
1.157596035	0	mesopic	2
1.440697867	0	mesopic	2
1.326794923	0	mesopic	2
1.304744749	0	mesopic	2
1.318781648	0	mesopic	2
1.338800744	0	mesopic	2
1.00344808	0	mesopic	2
1.23478142	0	mesopic	2
1.189864847	0	mesopic	2
1.265439191	0	mesopic	2
1.199976861	0	mesopic	2
1.31367417	0	mesopic	2
1.170302831	0	mesopic	2
1.305422722	0	mesopic	2
1.087080353	0	mesopic	2
1.369621134	0	mesopic	2
1.372045035	0	mesopic	2
1.289282085	0	mesopic	2
1.297976519	0	mesopic	2
1.320668855	0	mesopic	2
1.189279084	0	mesopic	2
1.249434902	0	mesopic	2
1.433264761	0	mesopic	2
1.325853834	0	mesopic	2
1.50161014	0	mesopic	2
1.205731691	0	mesopic	2
1.167173865	0	mesopic	2
1.345133382	0	mesopic	2
1.288439981	0	mesopic	2
1.171886755	0	mesopic	2
1.403288655	0	mesopic	2
1.138380461	0	mesopic	2
1.182692866	0	mesopic	2
1.235252607	0	mesopic	2
1.18754161	0	mesopic	2
1.463352379	0	mesopic	2
1.421693589	0	mesopic	2
1.087663455	0	mesopic	2
1.234934761	0	mesopic	2
1.185859313	0	mesopic	2
1.086579277	0	mesopic	2
1.351848695	0	mesopic	2
1.185397339	0	mesopic	2
1.330202282	0	mesopic	2
1.065511524	0	mesopic	2
1.311037707	0	mesopic	2
1.264364239	0	mesopic	2
1.381146203	0	mesopic	2
0.958110141	0	mesopic	2
1.281543353	0	mesopic	2
1.322622062	0	mesopic	2
1.208032562	0	mesopic	2
1.284290921	0	mesopic	2
1.482701252	0	mesopic	2
1.219409741	0	mesopic	2
1.184492478	0	mesopic	2
1.294237438	0	mesopic	2
1.085578379	0	mesopic	2
1.172986764	0	mesopic	2
1.324643758	0	mesopic	2
1.241059275	0	mesopic	2
1.15060785	0	mesopic	2
1.154709394	0	mesopic	2
1.419161448	0	mesopic	2
1.202770622	0	mesopic	2
1.3218771	0	mesopic	2
1.248785527	0	mesopic	2
1.318945808	0	mesopic	2
1.265481769	0	mesopic	2
1.208208524	0	mesopic	2
1.27220795	0	mesopic	2
1.243595281	0	mesopic	2
1.463947783	0	mesopic	2
1.249426908	0	mesopic	2
1.10418292	0	mesopic	2
1.237718582	0	mesopic	2
1.318321676	0	mesopic	2
1.233330953	0	mesopic	2
1.333573016	0	mesopic	2
1.242663327	0	mesopic	2
1.258745533	0	mesopic	2
1.236867736	0	mesopic	2
1.33689895	0	mesopic	2
1.248425853	0	mesopic	2
1.260966762	0	mesopic	2
1.408231152	0	mesopic	2
1.089320559	0	mesopic	2
1.299119828	0	mesopic	2
1.129828274	0	mesopic	2
1.290167276	0	mesopic	2
1.392456351	0	mesopic	2
1.388944325	0	mesopic	2
1.21602471	0	mesopic	2
1.403821758	0	mesopic	2
1.267463473	0	mesopic	2
1.313902134	0	mesopic	2
1.539380741	0	mesopic	2
1.23629708	0	mesopic	2
1.258302658	0	mesopic	2
1.364549354	0	mesopic	2
1.193817851	0	mesopic	2
1.203319681	0	mesopic	2
1.214081916	0	mesopic	2
1.225719245	0	mesopic	2
1.256142256	0	mesopic	2
1.348803744	0	mesopic	2
1.133825042	0	mesopic	2
1.04967231	0	mesopic	2
1.286392522	0	mesopic	2
1.556919558	0	mesopic	2
1.140579216	0	mesopic	2
1.290365719	0	mesopic	2
1.193586712	0	mesopic	2
0.972837508	0	mesopic	2
1.40946738	0	mesopic	2
1.254779173	0	mesopic	2
1.367388814	0	mesopic	2
1.042123811	0	mesopic	2
1.315511041	0	mesopic	2
1.1961224	0	mesopic	2
1.131060024	0	mesopic	2
1.319906886	0	mesopic	2
1.236364554	0	mesopic	2
1.322106109	0	mesopic	2
1.290003136	0	mesopic	2
1.050847918	0	mesopic	2
1.290262297	0	mesopic	2
1.298133796	0	mesopic	2
1.362098579	0	mesopic	2
1.1927917	0	mesopic	2
1.332755537	0	mesopic	2
1.267434541	0	mesopic	2
1.270473102	0	mesopic	2
1.01619606	0	mesopic	2
1.193573401	0	mesopic	2
1.18021901	0	mesopic	2
1.247266574	0	mesopic	2
1.259611435	0	mesopic	2
1.081047628	0	mesopic	2
1.161099072	0	mesopic	2
1.365900058	0	mesopic	2
1.296684534	0	mesopic	2
1.228774145	0	mesopic	2
1.270400868	0	mesopic	2
1.230534141	0	mesopic	2
1.223002204	0	mesopic	2
1.378523611	0	mesopic	2
1.408715713	0	mesopic	2
1.343917907	0	mesopic	2
1.251327441	0	mesopic	2
1.150879654	0	mesopic	2
1.278369536	0	mesopic	2
1.314383985	0	mesopic	2
1.363229406	0	mesopic	2
1.320858227	0	mesopic	2
1.316235033	0	mesopic	2
1.205727494	0	mesopic	2
1.246771249	0	mesopic	2
1.216684529	0	mesopic	2
1.240166927	0	mesopic	2
1.162522103	0	mesopic	2
1.214910196	0	mesopic	2
1.383462775	0	mesopic	2
1.15719088	0	mesopic	2
1.12485467	0	mesopic	2
1.24938826	0	mesopic	2
1.493879164	0	mesopic	2
1.212340311	0	mesopic	2
1.215034742	0	mesopic	2
1.161129252	0	mesopic	2
1.346244002	0	mesopic	2
1.236028876	0	mesopic	2
1.109931632	0	mesopic	2
1.374594813	0	mesopic	2
1.295013318	0	mesopic	2
1.273936905	0	mesopic	2
1.149933551	0	mesopic	2
1.133347954	0	mesopic	2
1.314234673	0	mesopic	2
1.359439892	0	mesopic	2
1.235942436	0	mesopic	2
1.307521361	0	mesopic	2
1.136691339	0	mesopic	2
1.241103355	0	mesopic	2
1.366455893	0	mesopic	2
1.121555812	0	mesopic	2
1.247437716	0	mesopic	2
1.402076304	0	mesopic	2
1.259626392	0	mesopic	2
1.263880601	0	mesopic	2
1.305042976	0	mesopic	2
1.335766274	0	mesopic	2
1.33430789	0	mesopic	2
1.230162983	0	mesopic	2
1.037686002	0	mesopic	2
1.193731971	0	mesopic	2
1.393518626	0	mesopic	2
1.404636472	0	mesopic	2
1.301679982	0	mesopic	2
1.379579359	0	mesopic	2
1.260179244	0	mesopic	2
1.266207223	0	mesopic	2
1.230035676	0	mesopic	2
1.237263345	0	mesopic	2
1.181553151	0	mesopic	2
1.222586881	0	mesopic	2
1.251267343	0	mesopic	2
1.313927092	0	mesopic	2
1.107986418	0	mesopic	2
1.230176409	0	mesopic	2
1.424467712	0	mesopic	2
1.093639884	0	mesopic	2
1.279346391	0	mesopic	2
1.311350335	0	mesopic	2
1.388350956	0	mesopic	2
1.142401665	0	mesopic	2
1.116385506	0	mesopic	2
1.192667026	0	mesopic	2
1.115669109	0	mesopic	2
1.341026696	0	mesopic	2
1.257446517	0	mesopic	2
1.093914753	0	mesopic	2
1.215279437	0	mesopic	2
1.397344138	0	mesopic	2
1.273489502	0	mesopic	2
1.024921217	0	mesopic	2
1.042695393	0	mesopic	2
1.317048004	0	mesopic	2
1.159646307	0	mesopic	2
1.039917265	0	mesopic	2
1.32175781	0	mesopic	2
1.252306739	0	mesopic	2
1.314350822	0	mesopic	2
1.041567817	0	mesopic	2
1.173583886	0	mesopic	2
1.224892322	0	mesopic	2
1.356073547	0	mesopic	2
1.124925808	0	mesopic	2
1.417624002	0	mesopic	2
1.217400816	0	mesopic	2
1.283361713	0	mesopic	2
1.181265992	0	mesopic	2
1.139232733	0	mesopic	2
1.199601639	0	mesopic	2
1.248061566	0	mesopic	2
1.241194217	0	mesopic	2
1.229748255	0	mesopic	2
1.365523508	0	mesopic	2
1.157584722	0	mesopic	2
1.152362492	0	mesopic	2
1.226463606	0	mesopic	2
1.309713697	0	mesopic	2
1.215962245	0	mesopic	2
1.427627391	0	mesopic	2
1.390714769	0	mesopic	2
1.34439298	0	mesopic	2
1.322285358	0	mesopic	2
1.500842487	0	mesopic	2
1.271219137	0	mesopic	2
1.233086194	0	mesopic	2
1.31307915	0	mesopic	2
1.070381238	0	mesopic	2
1.023881781	0	mesopic	2
1.224831593	0	mesopic	2
1.126350946	0	mesopic	2
1.247622604	0	mesopic	2
1.294207756	0	mesopic	2
1.170210184	0	mesopic	2
1.260672566	0	mesopic	2
1.327561912	0	mesopic	2
1.2849059	0	mesopic	2
1.342167633	0	mesopic	2
1.308464265	0	mesopic	2
1.226815682	0	mesopic	2
1.390943662	0	mesopic	2
1.320593563	0	mesopic	2
1.399746084	0	mesopic	2
1.274862265	0	mesopic	2
1.045130744	0	mesopic	2
1.224284167	0	mesopic	2
1.161898996	0	mesopic	2
1.227679791	0	mesopic	2
1.326124338	0	mesopic	2
1.335148791	0	mesopic	2
1.335763326	0	mesopic	2
1.358778328	0	mesopic	2
1.23641005	0	mesopic	2
1.310515782	0	mesopic	2
1.071918335	0	mesopic	2
1.203696817	0	mesopic	2
1.201336704	0	mesopic	2
1.293620935	0	mesopic	2
1.06710104	0	mesopic	2
1.25378446	0	mesopic	2
1.209889524	0	mesopic	2
1.162661636	0	mesopic	2
1.494158678	0	mesopic	2
1.368586312	0	mesopic	2
1.221700594	0	mesopic	2
1.435073569	0	mesopic	2
1.296432789	0	mesopic	2
1.164833855	0	mesopic	2
1.139889723	0	mesopic	2
1.403406233	0	mesopic	2
1.238705081	0	mesopic	2
1.171196256	0	mesopic	2
1.377378243	0	mesopic	2
1.344417739	0	mesopic	2
1.147239976	0	mesopic	2
1.396224778	0	mesopic	2
1.386369061	0	mesopic	2
1.273688436	0	mesopic	2
1.248895812	0	mesopic	2
1.08949631	0	mesopic	2
1.273291035	0	mesopic	2
1.144376164	0	mesopic	2
1.11787423	0	mesopic	2
1.411792162	0	mesopic	2
1.20333584	0	mesopic	2
1.212364249	0	mesopic	2
1.216277259	0	mesopic	2
1.277295974	0	mesopic	2
1.297743763	0	mesopic	2
1.232654577	0	mesopic	2
1.205014109	0	mesopic	2
0.921483578	0	mesopic	2
1.160841926	0	mesopic	2
1.366713636	0	mesopic	2
1.211975733	0	mesopic	2
1.306496286	0	mesopic	2
1.131263623	0	mesopic	2
1.179567636	0	mesopic	2
1.117628663	0	mesopic	2
1.386710197	0	mesopic	2
1.025859071	0	mesopic	2
1.157906191	0	mesopic	2
1.287045974	0	mesopic	2
1.176512582	0	mesopic	2
1.16587393	0	mesopic	2
1.170703185	0	mesopic	2
0.973602463	0	mesopic	2
1.28898171	0	mesopic	2
1.321414014	0	mesopic	2
1.414110146	0	mesopic	2
1.237033704	0	mesopic	2
1.272007254	0	mesopic	2
1.090784984	0	mesopic	2
1.122601083	0	mesopic	2
1.276539795	0	mesopic	2
1.247261592	0	mesopic	2
1.130413186	0	mesopic	2
1.284171591	0	mesopic	2
1.154303377	0	mesopic	2
1.338568519	0	mesopic	2
0.947133523	0	mesopic	2
1.127872527	0	mesopic	2
1.188639269	0	mesopic	2
1.437975897	0	mesopic	2
1.186299547	0	mesopic	2
1.380691474	0	mesopic	2
1.310649344	0	mesopic	2
1.234938352	0	mesopic	2
1.346931342	0	mesopic	2
1.114133887	0	mesopic	2
1.45883041	0	mesopic	2
1.1235497	0	mesopic	2
1.291776262	0	mesopic	2
1.140847897	0	mesopic	2
1.494610415	0	mesopic	2
1.234607801	0	mesopic	2
1.207443528	0	mesopic	2
1.166769336	0	mesopic	2
1.309875438	0	mesopic	2
1.263541066	0	mesopic	2
1.249196398	0	mesopic	2
1.257117337	0	mesopic	2
1.308310401	0	mesopic	2
1.436947481	0	mesopic	2
1.391703617	0	mesopic	2
1.262596983	0	mesopic	2
1.440488448	0	mesopic	2
1.260106026	0	mesopic	2
1.120310979	0	mesopic	2
1.326813665	0	mesopic	2
1.317393695	0	mesopic	2
1.222338976	0	mesopic	2
1.120788277	0	mesopic	2
1.384961352	0	mesopic	2
1.489362133	0	mesopic	2
1.182801043	0	mesopic	2
1.385891492	0	mesopic	2
1.22911201	0	mesopic	2
1.176345346	0	mesopic	2
1.223651371	0	mesopic	2
1.381124988	0	mesopic	2
1.205941141	0	mesopic	2
1.080051948	0	mesopic	2
0.951292221	0	mesopic	2
1.346781906	0	mesopic	2
1.213831472	0	mesopic	2
1.112576062	0	mesopic	2
1.18815909	0	mesopic	2
1.238843551	0	mesopic	2
1.313644914	0	mesopic	2
1.273014584	0	mesopic	2
1.175028157	0	mesopic	2
1.192924423	0	mesopic	2
1.076596574	0	mesopic	2
1.40977482	0	mesopic	2
1.230201429	0	mesopic	2
1.109072038	0	mesopic	2
1.352065886	0	mesopic	2
1.218074898	0	mesopic	2
1.221397983	0	mesopic	2
1.01254682	0	mesopic	2
1.449907177	0	mesopic	2
1.284971194	0	mesopic	2
1.269299472	0	mesopic	2
1.098598697	0	mesopic	2
1.471697965	0	mesopic	2
1.215270406	0	mesopic	2
1.280265875	0	mesopic	2
1.142392791	0	mesopic	2
1.224347123	0	mesopic	2
1.280355659	0	mesopic	2
1.415033449	0	mesopic	2
1.255646949	0	mesopic	2
1.175511702	0	mesopic	2
1.226057691	0	mesopic	2
1.133716569	0	mesopic	2
1.402692786	0	mesopic	2
1.210817583	0	mesopic	2
1.036732861	0	mesopic	2
1.390182289	0	mesopic	2
1.099697659	0	mesopic	2
1.18964119	0	mesopic	2
1.287505503	0	mesopic	2
1.261970367	0	mesopic	2
1.32270787	0	mesopic	2
1.378730624	0	mesopic	2
0.980175064	0	mesopic	2
1.264816699	0	mesopic	2
1.196899263	0	mesopic	2
1.085404487	0	mesopic	2
1.20497157	0	mesopic	2
1.25645988	0	mesopic	2
1.410671396	0	mesopic	2
1.22435963	0	mesopic	2
1.193047042	0	mesopic	2
1.060477262	0	mesopic	2
1.070469896	0	mesopic	2
1.13437773	0	mesopic	2
1.454284883	0	mesopic	2
1.301689945	0	mesopic	2
1.290970713	0	mesopic	2
1.315157162	0	mesopic	2
1.166382193	0	mesopic	2
1.242995456	0	mesopic	2
1.043768168	0	mesopic	2
1.500896299	0	mesopic	2
1.193875116	0	mesopic	2
1.511323881	0	mesopic	2
1.116372907	0	mesopic	2
1.320196519	0	mesopic	2
1.329841809	0	mesopic	2
1.068489197	0	mesopic	2
1.184151363	0	mesopic	2
1.516594359	0	mesopic	2
1.33411729	0	mesopic	2
1.310866901	0	mesopic	2
1.024463498	0	mesopic	2
1.251164297	0	mesopic	2
1.344952566	0	mesopic	2
1.023446172	0	mesopic	2
1.305839521	0	mesopic	2
1.382581611	0	mesopic	2
1.106130227	0	mesopic	2
1.16391289	0	mesopic	2
1.006340515	0	mesopic	2
1.288665024	0	mesopic	2
1.164043903	0	mesopic	2
1.031803793	0	mesopic	2
1.604570641	0	mesopic	2
1.167691256	0	mesopic	2
0.955158366	0	mesopic	2
1.476481855	0	mesopic	2
1.228737994	0	mesopic	2
1.25047177	0	mesopic	2
1.373089618	0	mesopic	2
1.366143956	0	mesopic	2
1.246798327	0	mesopic	2
1.24776996	0	mesopic	2
1.195678541	0	mesopic	2
1.330522866	0	mesopic	2
1.388299835	0	mesopic	2
1.406733796	0	mesopic	2
1.282193861	0	mesopic	2
1.316472127	0	mesopic	2
1.321461935	0	mesopic	2
1.388366003	0	mesopic	2
1.292476192	0	mesopic	2
1.309632038	0	mesopic	2
1.129638932	0	mesopic	2
1.237012232	0	mesopic	2
1.266493901	0	mesopic	2
1.31397368	0	mesopic	2
1.312253005	0	mesopic	2
1.475276176	0	mesopic	2
1.24740857	0	mesopic	2
1.352856888	0	mesopic	2
1.27463709	0	mesopic	2
1.277394496	0	mesopic	2
0.956191668	0	mesopic	2
1.429996544	0	mesopic	2
1.111996444	0	mesopic	2
1.33755138	0	mesopic	2
1.522847395	0	mesopic	2
1.247111041	0	mesopic	2
1.289157304	0	mesopic	2
1.304156413	0	mesopic	2
1.231354235	0	mesopic	2
1.293156915	0	mesopic	2
1.262136523	0	mesopic	2
1.062558279	0	mesopic	2
1.176730971	0	mesopic	2
1.306557384	0	mesopic	2
1.264073386	0	mesopic	2
1.20737772	0	mesopic	2
1.409445351	0	mesopic	2
1.133551145	0	mesopic	2
1.334076905	0	mesopic	2
1.32340251	0	mesopic	2
1.16627543	0	mesopic	2
1.06584839	0	mesopic	2
1.175069008	0	mesopic	2
1.246256605	0	mesopic	2
1.16176361	0	mesopic	2
1.294701916	0	mesopic	2
1.537523235	0	mesopic	2
1.24479724	0	mesopic	2
1.294079266	0	mesopic	2
1.231740833	0	mesopic	2
1.399403488	0	mesopic	2
1.244265651	0	mesopic	2
1.245130001	0	mesopic	2
1.487180782	0	mesopic	2
1.232343654	0	mesopic	2
1.007306443	0	mesopic	2
1.283379986	0	mesopic	2
1.212714167	0	mesopic	2
1.297170367	0	mesopic	2
1.104377043	0	mesopic	2
1.155575547	0	mesopic	2
1.473346818	0	mesopic	2
1.356494412	0	mesopic	2
1.059728383	0	mesopic	2
1.414308563	0	mesopic	2
1.295946726	0	mesopic	2
1.120814165	0	mesopic	2
1.163641253	0	mesopic	2
1.166120096	0	mesopic	2
1.314807842	0	mesopic	2
1.345796324	0	mesopic	2
1.125905547	0	mesopic	2
1.211059492	0	mesopic	2
1.232385389	0	mesopic	2
1.346329229	0	mesopic	2
1.185665127	0	mesopic	2
1.381266816	0	mesopic	2
1.329358536	0	mesopic	2
1.348137371	0	mesopic	2
1.240909062	0	mesopic	2
1.241261584	0	mesopic	2
1.307258002	0	mesopic	2
1.430194717	0	mesopic	2
1.087085139	0	mesopic	2
1.193934121	0	mesopic	2
1.159133917	0	mesopic	2
1.24855342	0	mesopic	2
1.216816754	0	mesopic	2
1.039883791	0	mesopic	2
1.085339061	0	mesopic	2
1.075479247	0	mesopic	2
1.22938202	0	mesopic	2
1.153345244	0	mesopic	2
1.462565353	0	mesopic	2
1.427774688	0	mesopic	2
1.153495487	0	mesopic	2
1.104016054	0	mesopic	2
1.354138651	0	mesopic	2
1.342776794	0	mesopic	2
1.521216696	0	mesopic	2
1.387913265	0	mesopic	2
1.30542372	0	mesopic	2
1.179104896	0	mesopic	2
1.11799672	0	mesopic	2
0.807294526	0	mesopic	2
1.312444123	0	mesopic	2
1.210802449	0	mesopic	2
1.503966494	0	mesopic	2
1.34734114	0	mesopic	2
1.248220375	0	mesopic	2
1.303780129	0	mesopic	2
1.138217799	0	mesopic	2
1.3110191	0	mesopic	2
1.126785134	0	mesopic	2
1.437325784	0	mesopic	2
1.097789697	0	mesopic	2
1.573889688	0	mesopic	2
1.251182522	0	mesopic	2
1.153945359	0	mesopic	2
1.192203361	0	mesopic	2
1.346395924	0	mesopic	2
1.251220943	0	mesopic	2
1.350793402	0	mesopic	2
1.431447168	0	mesopic	2
1.318370006	0	mesopic	2
1.196807299	0	mesopic	2
1.189856935	0	mesopic	2
1.267635728	0	mesopic	2
1.39016834	0	mesopic	2
1.526304629	0	mesopic	2
1.464074786	0	mesopic	2
1.312520438	0	mesopic	2
1.309309976	0	mesopic	2
1.272257667	0	mesopic	2
1.418314244	0	mesopic	2
1.180003578	0	mesopic	2
1.405280098	0	mesopic	2
1.180380874	0	mesopic	2
1.162061242	0	mesopic	2
1.246172557	0	mesopic	2
1.343038591	0	mesopic	2
1.127347633	0	mesopic	2
1.354654727	0	mesopic	2
1.100091189	0	mesopic	2
1.416141811	0	mesopic	2
1.370123498	0	mesopic	2
1.197127881	0	mesopic	2
1.0106238	0	mesopic	2
1.454830762	0	mesopic	2
1.235955735	0	mesopic	2
1.279546638	0	mesopic	2
1.296701736	0	mesopic	2
1.198610237	0	mesopic	2
1.080348289	0	mesopic	2
1.239971505	0	mesopic	2
1.221128033	0	mesopic	2
1.282771108	0	mesopic	2
1.230633408	0	mesopic	2
1.37350568	0	mesopic	2
1.067749741	0	mesopic	2
1.238015338	0	mesopic	2
1.144231312	0	mesopic	2
0.831021857	0	mesopic	2
1.35427828	0	mesopic	2
1.280681352	0	mesopic	2
1.170386288	0	mesopic	2
1.264564431	0	mesopic	2
1.307850351	0	mesopic	2
1.230932765	0	mesopic	2
1.296566283	0	mesopic	2
1.204362544	0	mesopic	2
1.315271815	0	mesopic	2
1.296984973	0	mesopic	2
1.190007691	0	mesopic	2
1.21974291	0	mesopic	2
1.220256785	0	mesopic	2
1.228524331	0	mesopic	2
1.167301789	0	mesopic	2
1.234082591	0	mesopic	2
1.497727885	0	mesopic	2
1.307307806	0	mesopic	2
1.153205816	0	mesopic	2
1.209943616	0	mesopic	2
1.139865607	0	mesopic	2
1.125044831	0	mesopic	2
1.299732049	0	mesopic	2
1.277719859	0	mesopic	2
1.389771231	0	mesopic	2
1.353264811	0	mesopic	2
1.256216185	0	mesopic	2
1.161163988	0	mesopic	2
1.212302369	0	mesopic	2
1.266790515	0	mesopic	2
1.298779812	0	mesopic	2
1.272732236	0	mesopic	2
1.250096297	0	mesopic	2
1.112015634	0	mesopic	2
1.318043226	0	mesopic	2
1.195753783	0	mesopic	2
1.205445458	0	mesopic	2
1.338097377	0	mesopic	2
1.186648645	0	mesopic	2
1.030159242	0	mesopic	2
1.236171648	0	mesopic	2
1.280101292	0	mesopic	2
1.272971962	0	mesopic	2
1.195048291	0	mesopic	2
1.2906777	0	mesopic	2
1.220051358	0	mesopic	2
1.173215763	0	mesopic	2
1.445506439	0	mesopic	2
1.149660234	0	mesopic	2
1.254251122	0	mesopic	2
1.256307548	0	mesopic	2
1.16084813	0	mesopic	2
1.239890175	0	mesopic	2
1.130668918	0	mesopic	2
1.211119087	0	mesopic	2
1.315592373	0	mesopic	2
1.005208578	0	mesopic	2
1.235994177	0	mesopic	2
1.21298538	0	mesopic	2
1.362144978	0	mesopic	2
1.417453269	0	mesopic	2
1.202526894	0	mesopic	2
1.306057751	0	mesopic	2
1.347425167	0	mesopic	2
1.325590294	0	mesopic	2
1.275852711	0	mesopic	2
1.498538188	0	mesopic	2
1.375345807	0	mesopic	2
1.278566915	0	mesopic	2
1.268235331	0	mesopic	2
1.242009001	0	mesopic	2
1.220030238	0	mesopic	2
1.306140258	0	mesopic	2
1.353544636	0	mesopic	2
1.348591602	0	mesopic	2
1.359917111	0	mesopic	2
1.281619502	0	mesopic	2
1.058054011	0	mesopic	2
1.267232812	0	mesopic	2
1.227477465	0	mesopic	2
1.248724449	0	mesopic	2
1.304231324	0	mesopic	2
1.321131194	0	mesopic	2
1.137695677	0	mesopic	2
1.267251523	0	mesopic	2
1.227967977	0	mesopic	2
1.099895622	0	mesopic	2
1.338066372	0	mesopic	2
1.468743747	0	mesopic	2
1.174210672	0	mesopic	2
1.317765734	0	mesopic	2
1.572334712	0	mesopic	2
1.113424492	0	mesopic	2
1.172153183	0	mesopic	2
1.375649893	0	mesopic	2
1.165259325	0	mesopic	2
1.09453905	0	mesopic	2
1.26097432	0	mesopic	2
1.169214493	0	mesopic	2
1.134298779	0	mesopic	2
1.397901989	0	mesopic	2
1.177824032	0	mesopic	2
1.248309449	0	mesopic	2
1.30758156	0	mesopic	2
1.378135336	0	mesopic	2
1.151952374	0	mesopic	2
1.23057811	0	mesopic	2
1.166053064	0	mesopic	2
1.13701114	0	mesopic	2
1.333032875	0	mesopic	2
1.564921296	0	mesopic	2
1.243444832	0	mesopic	2
1.161775628	0	mesopic	2
1.216830287	0	mesopic	2
1.222999195	0	mesopic	2
1.30718061	0	mesopic	2
1.168148403	0	mesopic	2
1.190719926	0	mesopic	2
1.375536819	0	mesopic	2
1.269472192	0	mesopic	2
1.386332571	0	mesopic	2
1.458924352	0	mesopic	2
1.32934069	0	mesopic	2
1.253445904	0	mesopic	2
1.369185275	0	mesopic	2
1.200308791	0	mesopic	2
1.392331957	0	mesopic	2
1.341327668	0	mesopic	2
1.304908784	0	mesopic	2
1.178516852	0	mesopic	2
1.2623798	0	mesopic	2
1.263574327	0	mesopic	2
1.448093001	0	mesopic	2
1.143307772	0	mesopic	2
1.362568071	0	mesopic	2
1.089394412	0	mesopic	2
1.184566026	0	mesopic	2
1.181657688	0	mesopic	2
1.032211068	0	mesopic	2
1.036173646	0	mesopic	2
1.273204891	0	mesopic	2
1.095810067	0	mesopic	2
1.187766643	0	mesopic	2
1.224978309	0	mesopic	2
1.097747841	0	mesopic	2
1.379211356	0	mesopic	2
1.202204361	0	mesopic	2
1.21704455	0	mesopic	2
1.543083975	0	mesopic	2
1.348475813	0	mesopic	2
1.351404772	0	mesopic	2
1.169061241	0	mesopic	2
1.178256451	0	mesopic	2
1.407725601	0	mesopic	2
1.088438705	0	mesopic	2
1.194482623	0	mesopic	2
1.20989618	1	mesopic	2
1.209049084	1	mesopic	2
1.075273111	1	mesopic	2
1.133473975	1	mesopic	2
1.248068622	1	mesopic	2
1.085866569	1	mesopic	2
1.148640736	1	mesopic	2
1.294368892	1	mesopic	2
1.289329752	1	mesopic	2
1.122143871	1	mesopic	2
1.148857277	1	mesopic	2
1.234494071	1	mesopic	2
1.122508613	1	mesopic	2
1.204612884	1	mesopic	2
1.197015045	1	mesopic	2
1.254481773	1	mesopic	2
1.177189025	1	mesopic	2
1.033134102	1	mesopic	2
1.253026587	1	mesopic	2
1.008843559	1	mesopic	2
1.154298742	1	mesopic	2
1.10979055	1	mesopic	2
1.068841923	1	mesopic	2
1.115252305	1	mesopic	2
1.307434421	1	mesopic	2
1.230264404	1	mesopic	2
1.045879264	1	mesopic	2
1.17724876	1	mesopic	2
1.212161152	1	mesopic	2
1.133563515	1	mesopic	2
1.183848943	1	mesopic	2
1.121027282	1	mesopic	2
1.064637432	1	mesopic	2
1.125076786	1	mesopic	2
1.151793076	1	mesopic	2
1.19269432	1	mesopic	2
1.035858113	1	mesopic	2
0.990289605	1	mesopic	2
1.215610506	1	mesopic	2
1.242717475	1	mesopic	2
1.177902066	1	mesopic	2
1.226359765	1	mesopic	2
1.135189913	1	mesopic	2
1.074562952	1	mesopic	2
1.120671142	1	mesopic	2
1.095302085	1	mesopic	2
1.015557025	1	mesopic	2
1.244409744	1	mesopic	2
1.134134464	1	mesopic	2
1.418483809	1	mesopic	2
0.95555234	1	mesopic	2
1.161225453	1	mesopic	2
1.107306313	1	mesopic	2
1.136854747	1	mesopic	2
1.160785321	1	mesopic	2
1.227475602	1	mesopic	2
1.161126449	1	mesopic	2
1.172575608	1	mesopic	2
1.093393078	1	mesopic	2
1.068297882	1	mesopic	2
1.009099173	1	mesopic	2
1.146313541	1	mesopic	2
1.239036691	1	mesopic	2
1.207486028	1	mesopic	2
1.157053237	1	mesopic	2
1.147613851	1	mesopic	2
1.244622856	1	mesopic	2
1.115799829	1	mesopic	2
1.27312757	1	mesopic	2
1.209862081	1	mesopic	2
1.205042785	1	mesopic	2
1.23849387	1	mesopic	2
1.162065132	1	mesopic	2
1.142787869	1	mesopic	2
1.42872534	1	mesopic	2
1.103197618	1	mesopic	2
1.257347096	1	mesopic	2
1.16614287	1	mesopic	2
1.309327265	1	mesopic	2
1.084814435	1	mesopic	2
1.190942247	1	mesopic	2
1.139732118	1	mesopic	2
1.220853253	1	mesopic	2
1.240108759	1	mesopic	2
1.102425609	1	mesopic	2
1.136591954	1	mesopic	2
1.003764778	1	mesopic	2
1.277839215	1	mesopic	2
1.211264275	1	mesopic	2
1.301487284	1	mesopic	2
1.194758179	1	mesopic	2
1.251795015	1	mesopic	2
1.02364943	1	mesopic	2
1.163997035	1	mesopic	2
1.284673015	1	mesopic	2
1.138791967	1	mesopic	2
1.123221335	1	mesopic	2
1.185682645	1	mesopic	2
1.248108593	1	mesopic	2
1.148230089	1	mesopic	2
1.146934498	1	mesopic	2
1.200826755	1	mesopic	2
1.083419542	1	mesopic	2
1.231844931	1	mesopic	2
1.159805822	1	mesopic	2
1.141803056	1	mesopic	2
1.329838752	1	mesopic	2
1.320992679	1	mesopic	2
1.155553121	1	mesopic	2
1.283502433	1	mesopic	2
1.158389635	1	mesopic	2
1.402997936	1	mesopic	2
1.250749052	1	mesopic	2
1.150231074	1	mesopic	2
1.132082419	1	mesopic	2
1.149888193	1	mesopic	2
1.138766828	1	mesopic	2
1.150722224	1	mesopic	2
1.070799159	1	mesopic	2
1.153424065	1	mesopic	2
1.154034228	1	mesopic	2
1.227880303	1	mesopic	2
1.272473555	1	mesopic	2
1.184057178	1	mesopic	2
1.106633116	1	mesopic	2
1.195630804	1	mesopic	2
1.122430634	1	mesopic	2
1.155069702	1	mesopic	2
1.197655976	1	mesopic	2
1.257820295	1	mesopic	2
1.284104215	1	mesopic	2
1.262746064	1	mesopic	2
1.139391273	1	mesopic	2
1.337290944	1	mesopic	2
1.305988149	1	mesopic	2
1.203225271	1	mesopic	2
1.112126157	1	mesopic	2
1.093442239	1	mesopic	2
1.179248868	1	mesopic	2
1.019518994	1	mesopic	2
1.176637814	1	mesopic	2
1.137838003	1	mesopic	2
1.131654739	1	mesopic	2
1.13208605	1	mesopic	2
1.000561811	1	mesopic	2
1.23717394	1	mesopic	2
1.118416706	1	mesopic	2
1.210066288	1	mesopic	2
1.234084213	1	mesopic	2
1.305855648	1	mesopic	2
1.228947185	1	mesopic	2
1.181018608	1	mesopic	2
1.110136382	1	mesopic	2
0.915815248	1	mesopic	2
1.20946047	1	mesopic	2
1.127737194	1	mesopic	2
1.224651841	1	mesopic	2
1.133555843	1	mesopic	2
1.119840874	1	mesopic	2
0.964430349	1	mesopic	2
1.203384951	1	mesopic	2
1.247388835	1	mesopic	2
1.188141507	1	mesopic	2
1.088012723	1	mesopic	2
1.284214487	1	mesopic	2
1.155128346	1	mesopic	2
1.179786031	1	mesopic	2
1.167702144	1	mesopic	2
1.25572777	1	mesopic	2
1.198027789	1	mesopic	2
1.260728195	1	mesopic	2
1.172216317	1	mesopic	2
1.220977322	1	mesopic	2
1.129589306	1	mesopic	2
1.291934878	1	mesopic	2
1.232025241	1	mesopic	2
1.042090071	1	mesopic	2
1.122089102	1	mesopic	2
1.193363986	1	mesopic	2
1.196546387	1	mesopic	2
1.147218814	1	mesopic	2
1.105671621	1	mesopic	2
1.236465793	1	mesopic	2
1.080842935	1	mesopic	2
1.303547093	1	mesopic	2
1.09912279	1	mesopic	2
1.29880926	1	mesopic	2
1.366259899	1	mesopic	2
1.148262664	1	mesopic	2
1.131482873	1	mesopic	2
1.201702802	1	mesopic	2
1.115164499	1	mesopic	2
1.095573406	1	mesopic	2
1.211320896	1	mesopic	2
1.256678306	1	mesopic	2
1.214151804	1	mesopic	2
1.122901835	1	mesopic	2
1.188413478	1	mesopic	2
0.966174673	1	mesopic	2
1.03282563	1	mesopic	2
1.318541056	1	mesopic	2
1.264947217	1	mesopic	2
1.190388441	1	mesopic	2
1.330863756	1	mesopic	2
1.177797927	1	mesopic	2
1.236906746	1	mesopic	2
1.21422056	1	mesopic	2
1.108326571	1	mesopic	2
1.040313978	1	mesopic	2
1.362011566	1	mesopic	2
1.069259586	1	mesopic	2
1.216566336	1	mesopic	2
1.188641361	1	mesopic	2
1.208386864	1	mesopic	2
1.194423584	1	mesopic	2
1.178172183	1	mesopic	2
1.147623565	1	mesopic	2
1.274136577	1	mesopic	2
1.101855264	1	mesopic	2
0.934087238	1	mesopic	2
1.170994482	1	mesopic	2
1.185567504	1	mesopic	2
1.082253675	1	mesopic	2
1.215753146	1	mesopic	2
1.234014834	1	mesopic	2
1.188098345	1	mesopic	2
1.132669519	1	mesopic	2
1.166106133	1	mesopic	2
1.217150478	1	mesopic	2
1.089084888	1	mesopic	2
1.099926413	1	mesopic	2
1.148339453	1	mesopic	2
1.121635868	1	mesopic	2
1.372670593	1	mesopic	2
1.239485129	1	mesopic	2
1.194615571	1	mesopic	2
1.18695785	1	mesopic	2
1.174970902	1	mesopic	2
1.335924369	1	mesopic	2
1.00641407	1	mesopic	2
1.023651039	1	mesopic	2
1.276292789	1	mesopic	2
1.116522686	1	mesopic	2
1.156494821	1	mesopic	2
1.199323287	1	mesopic	2
1.147804518	1	mesopic	2
1.074045101	1	mesopic	2
1.256269819	1	mesopic	2
1.165673476	1	mesopic	2
1.256836991	1	mesopic	2
1.114346473	1	mesopic	2
1.248977815	1	mesopic	2
1.23676496	1	mesopic	2
1.101289102	1	mesopic	2
1.220854709	1	mesopic	2
1.327109002	1	mesopic	2
1.390311502	1	mesopic	2
1.295563837	1	mesopic	2
1.262031389	1	mesopic	2
1.223869034	1	mesopic	2
1.271476672	1	mesopic	2
1.292813807	1	mesopic	2
1.173247446	1	mesopic	2
1.312901799	1	mesopic	2
1.064552229	1	mesopic	2
1.088320287	1	mesopic	2
1.147972751	1	mesopic	2
1.201575427	1	mesopic	2
1.072465362	1	mesopic	2
1.191131233	1	mesopic	2
1.128420368	1	mesopic	2
1.092235971	1	mesopic	2
1.184747533	1	mesopic	2
1.228448015	1	mesopic	2
1.175477661	1	mesopic	2
1.247473369	1	mesopic	2
1.13168607	1	mesopic	2
1.072985789	1	mesopic	2
1.214415534	1	mesopic	2
1.21922974	1	mesopic	2
1.359935832	1	mesopic	2
1.258709862	1	mesopic	2
1.131210535	1	mesopic	2
1.182646627	1	mesopic	2
1.191736652	1	mesopic	2
1.157019402	1	mesopic	2
1.247198382	1	mesopic	2
1.111677513	1	mesopic	2
1.133512865	1	mesopic	2
0.949870835	1	mesopic	2
1.255477241	1	mesopic	2
1.332160689	1	mesopic	2
1.332367051	1	mesopic	2
1.109892698	1	mesopic	2
1.224424033	1	mesopic	2
1.326906178	1	mesopic	2
1.406020086	1	mesopic	2
1.185887744	1	mesopic	2
1.177983011	1	mesopic	2
1.105009626	1	mesopic	2
1.094375117	1	mesopic	2
1.100430753	1	mesopic	2
1.141436673	1	mesopic	2
1.252541708	1	mesopic	2
1.180765458	1	mesopic	2
1.285449086	1	mesopic	2
1.010942597	1	mesopic	2
1.134640385	1	mesopic	2
1.195650885	1	mesopic	2
1.096246378	1	mesopic	2
1.273687383	1	mesopic	2
1.284769868	1	mesopic	2
1.297192669	1	mesopic	2
1.200040359	1	mesopic	2
1.36218408	1	mesopic	2
1.106257318	1	mesopic	2
1.148747897	1	mesopic	2
1.144930286	1	mesopic	2
1.059992433	1	mesopic	2
1.155388326	1	mesopic	2
1.275402273	1	mesopic	2
1.130255016	1	mesopic	2
1.34023223	1	mesopic	2
1.077100186	1	mesopic	2
0.993518399	1	mesopic	2
1.220254275	1	mesopic	2
1.379148488	1	mesopic	2
1.025264634	1	mesopic	2
1.061946028	1	mesopic	2
1.283545053	1	mesopic	2
1.348493095	1	mesopic	2
1.042160833	1	mesopic	2
1.220934843	1	mesopic	2
1.270159921	1	mesopic	2
1.147055876	1	mesopic	2
1.233818843	1	mesopic	2
1.207076793	1	mesopic	2
1.259235519	1	mesopic	2
1.308702653	1	mesopic	2
1.079825877	1	mesopic	2
1.110651594	1	mesopic	2
1.076095678	1	mesopic	2
1.175920703	1	mesopic	2
1.02810373	1	mesopic	2
1.127768976	1	mesopic	2
1.13857788	1	mesopic	2
1.188170872	1	mesopic	2
1.129383245	1	mesopic	2
1.041234291	1	mesopic	2
1.181218021	1	mesopic	2
1.257187959	1	mesopic	2
1.148863555	1	mesopic	2
1.111520002	1	mesopic	2
1.192159951	1	mesopic	2
1.216098491	1	mesopic	2
1.125422668	1	mesopic	2
1.217386016	1	mesopic	2
1.078867633	1	mesopic	2
1.251616944	1	mesopic	2
1.075901083	1	mesopic	2
1.178889621	1	mesopic	2
1.075499879	1	mesopic	2
1.20974251	1	mesopic	2
1.260578355	1	mesopic	2
1.181166808	1	mesopic	2
1.01897707	1	mesopic	2
1.121091487	1	mesopic	2
1.069879556	1	mesopic	2
1.284989539	1	mesopic	2
1.103178304	1	mesopic	2
1.167561876	1	mesopic	2
1.41044402	1	mesopic	2
1.27433241	1	mesopic	2
1.365065187	1	mesopic	2
1.038833825	1	mesopic	2
0.97212551	1	mesopic	2
1.150786461	1	mesopic	2
1.391682108	1	mesopic	2
1.136544668	1	mesopic	2
1.204293976	1	mesopic	2
1.155144488	1	mesopic	2
1.229701767	1	mesopic	2
1.199718474	1	mesopic	2
1.286473072	1	mesopic	2
1.224340787	1	mesopic	2
1.174495396	1	mesopic	2
1.145485801	1	mesopic	2
1.241262759	1	mesopic	2
1.240339394	1	mesopic	2
1.123142849	1	mesopic	2
1.091446005	1	mesopic	2
1.231533582	1	mesopic	2
1.070910711	1	mesopic	2
1.174785283	1	mesopic	2
1.163490136	1	mesopic	2
1.089683693	1	mesopic	2
1.186822639	1	mesopic	2
1.039383989	1	mesopic	2
1.160170082	1	mesopic	2
1.106115357	1	mesopic	2
1.106979914	1	mesopic	2
1.153141314	1	mesopic	2
1.11051818	1	mesopic	2
1.053364631	1	mesopic	2
1.256582664	1	mesopic	2
1.254677327	1	mesopic	2
1.158155474	1	mesopic	2
1.139826911	1	mesopic	2
1.291075189	1	mesopic	2
1.072556809	1	mesopic	2
1.271606503	1	mesopic	2
1.241504298	1	mesopic	2
1.142042375	1	mesopic	2
1.24182962	1	mesopic	2
1.033415415	1	mesopic	2
1.068950278	1	mesopic	2
1.201290248	1	mesopic	2
1.151490585	1	mesopic	2
1.393237944	1	mesopic	2
1.232605569	1	mesopic	2
1.123700055	1	mesopic	2
1.164984341	1	mesopic	2
1.132455744	1	mesopic	2
1.162289926	1	mesopic	2
1.297967126	1	mesopic	2
1.241172694	1	mesopic	2
1.171402422	1	mesopic	2
1.052526624	1	mesopic	2
1.091000304	1	mesopic	2
1.127624259	1	mesopic	2
1.115492897	1	mesopic	2
1.195140313	1	mesopic	2
1.220705361	1	mesopic	2
1.118306313	1	mesopic	2
1.189126811	1	mesopic	2
1.260707266	1	mesopic	2
1.285396995	1	mesopic	2
1.167452029	1	mesopic	2
1.159322409	1	mesopic	2
1.121206294	1	mesopic	2
1.190432135	1	mesopic	2
1.22975606	1	mesopic	2
1.151953666	1	mesopic	2
1.113120695	1	mesopic	2
1.159294913	1	mesopic	2
1.163409232	1	mesopic	2
1.070367578	1	mesopic	2
1.116660423	1	mesopic	2
1.318283939	1	mesopic	2
1.228503579	1	mesopic	2
1.16677533	1	mesopic	2
1.227228847	1	mesopic	2
1.324762147	1	mesopic	2
1.134263253	1	mesopic	2
1.231545064	1	mesopic	2
1.388499231	1	mesopic	2
1.19715044	1	mesopic	2
1.104918769	1	mesopic	2
1.187205349	1	mesopic	2
1.042972863	1	mesopic	2
1.118153371	1	mesopic	2
1.185192326	1	mesopic	2
1.179855959	1	mesopic	2
1.187172847	1	mesopic	2
1.108630805	1	mesopic	2
1.166888586	1	mesopic	2
1.067699379	1	mesopic	2
1.304489552	1	mesopic	2
1.052053211	1	mesopic	2
1.174054028	1	mesopic	2
1.036817438	1	mesopic	2
1.188722812	1	mesopic	2
1.171383362	1	mesopic	2
1.268876702	1	mesopic	2
1.214801063	1	mesopic	2
1.242933261	1	mesopic	2
1.139131877	1	mesopic	2
1.11600727	1	mesopic	2
1.049092588	1	mesopic	2
1.182480265	1	mesopic	2
1.386620051	1	mesopic	2
1.213645385	1	mesopic	2
1.338905849	1	mesopic	2
1.140197244	1	mesopic	2
1.202076786	1	mesopic	2
1.127200717	1	mesopic	2
1.258070752	1	mesopic	2
1.335007523	1	mesopic	2
1.217172273	1	mesopic	2
1.166046344	1	mesopic	2
1.033017135	1	mesopic	2
1.201051147	1	mesopic	2
1.064566218	1	mesopic	2
0.979366551	1	mesopic	2
1.216780227	1	mesopic	2
1.249304263	1	mesopic	2
1.264035582	1	mesopic	2
1.274939532	1	mesopic	2
1.184793549	1	mesopic	2
1.314167453	1	mesopic	2
1.189232143	1	mesopic	2
1.237709419	1	mesopic	2
1.027481844	1	mesopic	2
1.352398362	1	mesopic	2
1.155779902	1	mesopic	2
1.147202091	1	mesopic	2
1.261740557	1	mesopic	2
1.111954876	1	mesopic	2
1.04570116	1	mesopic	2
1.207681999	1	mesopic	2
1.230980987	1	mesopic	2
1.165388651	1	mesopic	2
1.167069242	1	mesopic	2
1.202454089	1	mesopic	2
1.020240425	1	mesopic	2
1.036600434	1	mesopic	2
1.190655813	1	mesopic	2
1.081016405	1	mesopic	2
1.290345279	1	mesopic	2
1.185249899	1	mesopic	2
1.188125472	1	mesopic	2
1.136174839	1	mesopic	2
1.206351989	1	mesopic	2
1.054107541	1	mesopic	2
1.132714749	1	mesopic	2
1.131560308	1	mesopic	2
1.126418841	1	mesopic	2
1.280855452	1	mesopic	2
1.148407822	1	mesopic	2
1.120659758	1	mesopic	2
1.258500192	1	mesopic	2
1.267543572	1	mesopic	2
1.218500396	1	mesopic	2
1.03955367	1	mesopic	2
1.08027836	1	mesopic	2
1.252472285	1	mesopic	2
1.090194591	1	mesopic	2
1.013145036	1	mesopic	2
1.212108217	1	mesopic	2
1.308653814	1	mesopic	2
1.157404216	1	mesopic	2
1.134486551	1	mesopic	2
1.224950962	1	mesopic	2
1.204653922	1	mesopic	2
1.22204	1	mesopic	2
1.241594784	1	mesopic	2
1.212977497	1	mesopic	2
1.167434006	1	mesopic	2
1.077517438	1	mesopic	2
1.131791524	1	mesopic	2
1.129995756	1	mesopic	2
1.122539925	1	mesopic	2
1.265677266	1	mesopic	2
1.092289784	1	mesopic	2
1.082157416	1	mesopic	2
1.242364426	1	mesopic	2
1.256821349	1	mesopic	2
1.07170839	1	mesopic	2
1.049967477	1	mesopic	2
1.02610344	1	mesopic	2
1.07818863	1	mesopic	2
1.205062868	1	mesopic	2
0.966367442	1	mesopic	2
1.132599777	1	mesopic	2
1.211251076	1	mesopic	2
1.111402483	1	mesopic	2
1.392266231	1	mesopic	2
1.066332461	1	mesopic	2
1.19359068	1	mesopic	2
1.246546732	1	mesopic	2
1.062160939	1	mesopic	2
[truncated: 2,673 more rows]
