# Supplementary material for: Robust cone-mediated signaling persists late into rod photoreceptor degeneration
Source: eLife. 2022 Aug 30;11:e80271. doi: 10.7554/eLife.80271 (PMC9560159; doi:10.7554/eLife.80271)
Supplement: Figure 7—source data 1. [file elife-80271-fig7-data1.csv]

psd_ratio	age	.
0.216534481	0
0.190548042	0
0.334850987	0
0.214654064	0
0.241889505	0
0.137465744	0
0.303833519	0
0.115608183	0
0.159472582	0
0.211189857	0
0.212002988	0
0.176500188	0
0.3082249	0
0.215480111	0
0.196449108	0
0.15647739	0
0.27044768	0
0.108212086	0
0.151475618	0
0.312480047	0
0.23396912	0
0.314135509	0
0.116536823	0
0.151439376	0
0.124758555	0
0.229724554	0
0.089298012	0
0.231924234	0
0.189117134	0
0.183696732	0
0.186778342	0
0.127467596	0
0.174264621	0
0.223273551	0
0.256214816	0
0.350853299	0
0.187889702	0
0.050589212	0
0.288386359	0
0.143163226	0
0.425832911	0
0.159100889	0
0.42510443	0
0.205392092	0
0.045478178	0
0.150575476	0
0.052595413	0
0.22273731	0
0.028989773	0
0.072651266	0
0.552772935	0
0.114454221	0
0.169865341	0
0.191735771	0
0.15750325	0
0.216314649	0
0.125400774	0
0.290886836	0
0.225778572	0
0.191609004	0
0.188956155	0
0.260946953	0
0.096289363	0
0.088954924	0
0.505919247	0
0.037156237	0
0.201559166	0
0.094525707	0
0.235154213	0
0.036637842	0
0.336741843	0
0.193972761	0
0.076169808	0
0.042978896	0
0.302980904	0
0.181418225	0
0.227751406	0
0.32202812	0
0.187640498	0
0.139810064	0
0.109928219	0
0.089309601	0
0.142387565	0
0.114992983	0
0.255649835	0
0.087771095	0
0.088108504	0
0.162289438	0
0.148374442	0
0.326689224	0
0.068873218	0
0.155304575	0
0.11981144	0
0.158493801	0
0.187214648	0
0.221907506	0
0.232956202	0
0.134391908	0
0.070695736	0
0.162494397	0
0.216127203	0
0.360345632	0
0.170562927	0
0.165506048	0
0.120046743	0
0.257209525	0
0.137261994	0
0.255874877	0
0.06352103	0
0.143506144	0
0.167942509	0
0.14833253	0
0.238966563	0
0.153524604	0
0.113480799	0
0.299467097	0
0.14926402	0
0.260067509	0
0.182211971	0
0.261952183	0
0.195148347	0
0.262038892	0
0.154476554	0
0.03409845	0
0.21983149	0
0.102724558	0
0.092560756	0
0.151550246	0
0.143762493	0
0.256463623	0
0.216874773	0
0.363678995	0
0.197820618	0
0.197065042	0
0.232358619	0
0.161847977	0
0.186527984	0
0.188209704	0
0.234262312	0
0.217501952	0
0.172014315	0
0.207296322	0
0.179228356	0
0.317933918	0
0.200822831	0
0.132974273	0
0.170898605	0
0.127430788	0
0.225892531	0
0.327334351	0
0.289905968	0
0.225741326	0
0.189122156	0
0.237788842	0
0.193414445	0
0.038019767	0
0.247574784	0
0.158151929	0
0.413556514	0
0.648010327	0
0.083410319	0
0.28299777	0
0.215562715	0
0.143025148	0
0.302747076	0
0.188873328	0
0.166289988	0
0.094655441	0
0.133435559	0
0.173029844	0
0.171080891	0
0.347673273	0
0.169434359	0
0.152291151	0
0.22050365	0
0.094682895	0
0.280909078	0
0.203457352	0
0.159801181	0
0.328486312	0
0.270838627	0
0.360362267	0
0.099602759	0
0.139376187	0
0.100300508	0
0.243839982	0
0.407339514	0
0.296467938	0
0.077195691	0
0.049966052	0
0.40534525	0
0.162134215	0
0.103881369	0
0.170780026	0
0.065172398	0
0.197103643	0
0.203270619	0
0.220732482	0
0.255129096	0
0.133199237	0
0.290708304	0
0.086094659	0
0.135866667	0
0.25993699	0
0.28685172	0
0.16587342	0
0.060263507	0
0.161602187	0
0.137511403	0
0.156322645	0
0.298732676	0
0.230645444	0
0.125615668	0
0.058765606	0
0.244978586	0
0.162893191	0
0.082206745	0
0.152149245	0
0.120247575	0
0.144616605	0
0.168996197	0
0.309673088	0
0.296003289	0
0.149752185	0
0.043136197	0
0.568343841	0
0.082709079	0
0.146379647	0
0.227619704	0
0.256927165	0
0.084723588	0
0.240983783	0
0.334790358	0
0.264884522	0
0.331680445	0
0.110460786	0
0.184761499	0
0.27156671	0
0.253360229	0
0.150327489	0
0.288919444	0
0.116155899	0
0.169700473	0
0.219537019	0
0.279545353	0
0.017416795	0
0.384760968	0
0.256877107	0
0.432284952	0
0.377865301	0
0.222309749	0
0.293479358	0
0.192132411	0
0.292138287	0
0.248431877	0
0.326793286	0
0.128692905	0
0.156212794	0
0.254379303	0
0.093068961	0
0.157048268	0
0.238423259	0
0.321424145	0
0.077870573	0
0.04661163	0
0.099830343	0
0.097768477	0
0.13099234	0
0.251107855	0
0.363116405	0
0.216475368	0
0.250306276	0
0.045041693	0
0.271909125	0
0.329694102	0
0.117556716	0
0.146122584	0
0.175464188	0
0.148917726	0
0.239188636	0
0.135238144	0
0.151382944	0
0.124711149	0
0.315452147	0
0.084642924	0
0.335680439	0
0.232863019	0
0.192093814	0
0.225748359	0
0.264417133	0
0.42674732	0
0.296004075	0
0.18375806	0
0.071852967	0
0.239133971	0
0.262054932	0
0.259316591	0
0.175013476	0
0.164487066	0
0.12723159	0
0.061213063	0
0.252645129	0
0.279143737	0
0.097855018	0
0.144097881	0
0.205884904	0
0.442344413	0
0.152038277	0
0.184013355	0
0.420220684	0
0.191513396	0
0.15321719	0
0.385781397	0
0.152580249	0
0.166184118	0
0.281831314	0
0.072531088	0
0.329254038	0
0.236319074	0
0.198353083	0
0.215213647	0
0.14528106	0
0.154724926	0
0.308007677	0
0.307661965	0
0.123615293	0
0.044528522	0
0.260490624	0
0.262060083	0
0.064667889	0
0.190352176	0
0.161545174	0
0.206626782	0
0.127321372	0
0.165404412	0
0.086591673	0
0.360669604	0
0.147454107	0
0.130240727	0
0.297740858	0
0.187456165	0
0.149909991	0
0.430274469	0
0.353949944	0
0.086559253	0
0.138122036	0
0.353168225	0
0.057028841	0
0.092112455	0
0.08834197	0
0.090672026	0
0.080271099	0
0.183255759	0
0.453329306	0
0.09815906	0
0.099418775	0
0.375993819	0
0.097655365	0
0.324953005	0
0.286045646	0
0.373771598	0
0.221922953	0
0.174771396	0
0.187119778	0
0.159695735	0
0.243084152	0
0.039276094	0
0.182352306	0
0.10671307	0
0.236246271	0
0.321932689	0
0.152263974	0
0.28016846	0
0.222489477	0
0.379919144	0
0.136963937	0
0.052614812	0
0.293498365	0
0.178173956	0
0.291112996	0
0.196145533	0
0.357174533	0
0.131932391	0
0.23246696	0
0.280603144	0
0.132490246	0
0.329347715	0
0.378100352	0
0.126481463	0
0.20349164	0
0.523993836	0
0.091468879	0
0.102214404	0
0.173644542	0
0.18321898	0
0.253062836	0
0.042596034	0
0.345385317	0
0.204568801	0
0.170238842	0
0.245562901	0
0.21885402	0
0.345072955	0
0.030957721	0
0.049722999	0
0.052670198	0
0.196771971	0
0.208146242	0
0.068601489	0
0.153361385	0
0.280894545	0
0.135102625	0
0.191691395	0
0.120567354	0
0.277110617	0
0.054203549	0
0.142732653	0
0.257168635	0
0.434867728	0
0.187386476	0
0.205108787	0
0.381247934	0
0.230843081	0
0.098234413	0
0.146142702	0
0.251328223	0
0.182605716	0
0.206954813	0
0.171540828	0
0.179109599	0
0.094932084	0
0.145903669	0
0.054070524	0
0.204929556	0
0.139426231	0
0.020062445	0
0.126857891	0
0.069611117	0
0.241496681	0
0.161258372	0
0.04297229	0
0.231342375	0
0.159170691	0
0.283357122	0
0.137994814	0
0.254628804	0
0.194538467	0
0.259740719	0
0.137053565	0
0.284538006	0
0.41489135	0
0.07417655	0
0.167089896	0
0.210123995	0
0.244631968	0
0.279175698	0
0.106548092	0
0.490439573	0
0.098361213	0
0.249188104	0
0.25940368	0
0.111169028	0
0.311924944	0
0.207954965	0
0.079232578	0
0.095124167	0
0.465402919	0
0.173276361	0
0.295410728	0
0.089108619	0
0.373251405	0
0.257240781	0
0.314606728	0
0.12452994	0
0.27017049	0
0.219542218	0
0.240563082	0
0.302653985	0
0.149041171	0
0.112505912	0
0.09725061	0
0.273681843	0
0.209592868	0
0.218175836	0
0.174363778	0
0.103082688	0
0.244258196	0
0.413897993	0
0.298479966	0
0.128647769	0
0.180741692	0
0.302986069	0
0.097109098	0
0.105660344	0
0.22888957	0
0.247731692	0
0.129855304	0
0.185008666	0
0.144640404	0
0.143531635	0
0.430788817	0
0.21088511	0
0.274651557	0
0.332977987	0
0.268125018	0
0.171458645	0
0.123997591	0
0.332492311	0
0.121191536	0
0.254080767	0
0.142247922	0
0.200001455	0
0.322176332	0
0.234957662	0
0.156564992	0
0.163149698	0
0.514127494	0
0.012652894	0
0.288266286	0
0.031495942	0
0.168707849	0
0.107533104	0
0.165107621	0
0.198470032	0
0.082556912	0
0.314382717	0
0.319590727	0
0.066340229	0
0.282347526	0
0.114301531	0
0.12002315	0
0.085621085	0
0.202305249	0
0.040288189	0
0.033318856	0
0.208318627	0
0.329898114	0
0.119214735	0
0.139900057	0
0.302528716	0
0.224425709	0
0.17942376	0
0.159201826	0
0.646051418	0
0.18459849	0
0.078348206	0
0.294517676	0
0.211433615	0
0.260821487	0
0.275664891	0
0.425616486	0
0.188331129	0
0.251334646	0
0.254602166	0
0.196754113	0
0.309111145	0
0.150614862	0
0.123283942	0
0.113464576	0
0.076522247	0
0.294269613	0
0.159837459	0
0.206097502	0
0.094691363	0
0.204506974	0
0.018325066	0
0.03366878	0
0.375517975	0
0.055532141	0
0.144704149	0
0.079915591	0
0.130161215	0
0.213906646	0
0.45409385	0
0.226600118	0
0.141897881	0
0.232627048	0
0.10378749	0
0.206410803	0
0.414519197	0
0.148532056	0
0.141844277	0
0.324607661	0
0.247091253	0
0.261420855	0
0.333487056	0
0.187102311	0
0.307470373	0
0.068218538	0
0.250306742	0
0.295325216	0
0.193369307	0
0.221515	0
0.398221009	0
0.324257878	0
0.420721522	0
0.080543189	0
0.106436403	0
0.248878942	0
0.198746108	0
0.136670881	0
0.342142186	0
0.188780303	0
0.109455985	0
0.230590032	0
0.125859509	0
0.078890239	0
0.32385064	0
0.28174809	0
0.075374535	0
0.241923152	0
0.169784402	0
0.087385411	0
0.223851022	0
0.269869853	0
0.206876738	0
0.335571495	0
0.067666573	0
0.338322395	0
0.289516184	0
0.416326785	0
0.072807586	0
0.209667971	0
0.053190992	0
0.313780593	0
0.219772843	0
0.144125645	0
0.2336785	0
0.398777544	0
0.25891018	0
0.242622299	0
0.379687754	0
0.307953725	0
0.109275764	0
0.311399998	0
0.260639069	0
0.113409339	0
0.097549669	0
0.200487419	0
0.071312024	0
0.268064249	0
0.349698389	0
0.271052287	0
0.0927803	0
0.16658196	0
0.15275066	0
0.176703107	0
0.137554665	0
0.175377136	0
0.154076521	0
0.252981898	0
0.076716237	0
0.160448754	0
0.163535801	0
0.15239499	0
0.173403114	0
0.193267828	0
0.158209358	0
0.264806411	0
0.192580863	0
0.034450923	0
0.10111096	0
0.143597932	0
0.659608437	0
0.242791235	0
0.08082409	0
0.27674888	0
0.16710609	0
0.073975503	0
0.341700496	0
0.116082917	0
0.13116198	0
0.465595041	0
0.105981484	0
0.08811067	0
0.317652533	0
0.118108295	0
0.354639242	0
0.252587219	0
0.188586267	0
0.308310069	0
0.317710213	0
0.311212644	0
0.164375409	0
0.021873236	0
0.191003071	0
0.107109474	0
0.223327449	0
0.325861033	0
0.296346307	0
0.074927448	0
0.295444289	0
0.305855013	0
0.238384373	0
0.106502972	0
0.055237311	0
0.463941868	0
0.375260469	0
0.164126967	0
0.236020519	0
0.132741633	0
0.34083621	0
0.22697904	0
0.04377338	0
0.166612724	0
0.05821279	0
0.134703352	0
0.149936434	0
0.4340198	0
0.067929171	0
0.212851138	0
0.225310397	0
0.151323627	0
0.122629233	0
0.264949732	0
0.231401841	0
0.234354707	0
0.354158033	0
0.160823289	0
0.182549401	0
0.168543907	0
0.405539973	0
0.154571413	0
0.094215112	0
0.282326525	0
0.35103253	0
0.298562178	0
0.365876777	0
0.220819031	0
0.052663399	0
0.247742903	0
0.377932997	0
0.303928561	0
0.128111252	0
0.317466767	0
0.425911679	0
0.41744211	0
0.214665152	0
0.353078195	0
0.293913322	0
0.059672035	0
0.170528161	0
0.575538446	0
0.301602304	0
0.127857814	0
0.161795171	0
0.099609586	0
0.051890929	0
0.546987238	0
0.072726987	0
0.474405041	0
0.261071344	0
0.218691865	0
0.164980655	0
0.481317667	0
0.194965731	0
0.101368862	0
0.216255772	0
0.190361942	0
0.231639321	0
0.148560173	0
0.206138917	0
0.148712718	0
0.268877563	0
0.091049469	0
0.079422539	0
0.110051921	0
0.130416781	0
0.169167039	0
0.047901469	0
0.229376446	0
0.301256411	0
0.417708485	0
0.075354628	0
0.208231338	0
0.278539007	0
0.222940691	0
0.045209642	0
0.321124432	0
0.195750096	0
0.110432154	0
0.264000521	0
0.511846297	0
0.222556412	0
0.144969837	0
0.213121505	0
0.087736982	0
0.325591749	0
0.233860903	0
0.102798167	0
0.137143997	0
0.108812761	0
0.109640899	0
0.142520664	0
0.23358789	0
0.174428617	0
0.083021874	0
0.41024884	0
0.171898386	0
0.133628215	0
0.1001741	0
0.193744095	0
0.109535688	0
0.106820127	0
0.409847424	0
0.133102678	0
0.17765517	0
0.083193302	0
0.17738241	0
0.258027344	0
0.218080615	0
0.170631293	0
0.124732511	0
0.218351763	0
0.043114097	0
0.118939144	0
0.317133105	0
0.122562162	0
0.021590169	0
0.062615755	0
0.048153834	0
0.278837636	0
0.15929014	0
0.137227902	0
0.286112275	0
0.273095737	0
0.16103474	0
0.128898153	0
0.165622481	0
0.13881875	0
0.065481205	0
0.395656093	0
0.080889968	0
0.128833987	0
0.153070359	0
0.08220194	0
0.117867438	0
0.38500923	0
0.102664396	0
0.324792037	0
0.062100532	0
0.424786147	0
0.476769513	0
0.197073624	0
0.134847495	0
0.25110767	1
0.105214056	1
0.417903689	1
0.329490967	1
0.353312788	1
0.164142758	1
0.203987712	1
0.317280565	1
0.244861077	1
0.345872802	1
0.279600997	1
0.233480864	1
0.173572722	1
0.240724239	1
0.059842088	1
0.109560503	1
0.329053791	1
0.346669496	1
0.212996476	1
0.097834403	1
0.222264439	1
0.09674036	1
0.128314222	1
0.100134407	1
0.088296446	1
0.03390203	1
0.394293922	1
0.282615203	1
0.372143768	1
0.384786483	1
0.311814672	1
0.218564995	1
0.370145589	1
0.152882561	1
0.157900783	1
0.097279067	1
0.080026695	1
0.272351395	1
0.190297354	1
0.095501209	1
0.258022197	1
0.176848235	1
0.125100688	1
0.16540058	1
0.169822379	1
0.204813722	1
0.207741958	1
0.277606622	1
0.186078035	1
0.138395182	1
0.235561811	1
0.114594118	1
0.180794778	1
0.273273093	1
0.144994237	1
0.118023874	1
0.223074035	1
0.111852996	1
0.073527055	1
0.144103603	1
0.381470785	1
0.181818992	1
0.159718499	1
0.40644487	1
0.31062001	1
0.341257583	1
0.296505879	1
0.244314597	1
0.160992891	1
0.257590121	1
0.084373572	1
0.195373878	1
0.254735438	1
0.258036288	1
0.195602427	1
0.06680691	1
0.244285573	1
0.437526492	1
0.082470323	1
0.202616998	1
0.240708488	1
0.305371413	1
0.195872636	1
0.221354514	1
0.262229822	1
0.227323201	1
0.195086354	1
0.236381962	1
0.341360305	1
0.114789679	1
0.105371043	1
0.166295212	1
0.269702496	1
0.203916282	1
0.113072537	1
0.310743458	1
0.364610821	1
0.120921581	1
0.239744004	1
0.258668586	1
0.197473303	1
0.066772056	1
0.292272406	1
0.255663326	1
0.329174262	1
0.064825396	1
0.199317171	1
0.078078017	1
0.198950125	1
0.196268016	1
0.295183361	1
0.057361947	1
0.274183448	1
0.227453105	1
0.299197668	1
0.223319596	1
0.071452549	1
0.310835954	1
0.127114703	1
0.046388753	1
0.245838104	1
0.244032187	1
0.102790269	1
0.027660844	1
0.376484977	1
0.240267529	1
0.400562723	1
0.446010313	1
0.344123027	1
0.272560076	1
0.116731152	1
0.100007899	1
0.067396232	1
0.079982303	1
0.141528828	1
0.146573024	1
0.089209659	1
0.241356714	1
0.24060397	1
0.106911113	1
0.09818285	1
0.151473285	1
0.223943482	1
0.108480578	1
0.10983347	1
0.06317862	1
0.186895178	1
0.219751915	1
0.167782795	1
0.084526742	1
0.162239258	1
0.200231089	1
0.091370506	1
0.169577719	1
0.263077583	1
0.21741499	1
0.149174118	1
0.12996265	1
0.172261918	1
0.152723834	1
0.183193418	1
0.098283439	1
0.275831491	1
0.191707576	1
0.155786905	1
0.194547147	1
0.229785201	1
0.343536361	1
0.116877759	1
0.163646115	1
0.301240916	1
0.179100708	1
0.100526464	1
0.298281993	1
0.299711659	1
0.182163661	1
0.095923713	1
0.315141598	1
0.264532787	1
0.11927145	1
0.217186519	1
0.253615013	1
0.153090714	1
0.276879664	1
0.161956954	1
0.239567901	1
0.109188128	1
0.312656734	1
0.316613995	1
0.202338721	1
0.365852697	1
0.158043132	1
0.131749759	1
0.11873785	1
0.203373634	1
0.165101963	1
0.36512236	1
0.153624888	1
0.202291856	1
0.197194943	1
0.156390221	1
0.045947797	1
0.143316572	1
0.285934842	1
0.258705849	1
0.126142459	1
0.21700416	1
0.048529916	1
0.221238076	1
0.235216088	1
0.279205859	1
0.146189209	1
0.267897816	1
0.045890384	1
0.130118443	1
0.175871133	1
0.163554117	1
0.077686072	1
0.622347119	1
0.225204692	1
0.244026609	1
0.268835078	1
0.039594466	1
0.167626418	1
0.309917072	1
0.363694166	1
0.380531162	1
0.064941948	1
0.176014154	1
0.156039866	1
0.299403247	1
0.103474595	1
0.130956677	1
0.334933129	1
0.223626261	1
0.271393259	1
0.233946231	1
0.237362167	1
0.140635323	1
0.296039563	1
0.081626036	1
0.134951528	1
0.058052455	1
0.185746552	1
0.138705226	1
0.067303519	1
0.461291401	1
0.219773727	1
0.214517983	1
0.265466005	1
0.392349049	1
0.039544638	1
0.188225223	1
0.255968528	1
0.2074295	1
0.100380807	1
0.102741802	1
0.357731157	1
0.424476131	1
0.124757159	1
0.169012992	1
0.537989331	1
0.289577925	1
0.104322475	1
0.162202298	1
0.253182396	1
0.095651374	1
0.322116002	1
0.158913776	1
0.19783365	1
0.277188901	1
0.069202998	1
0.132695416	1
0.046816083	1
0.138920206	1
0.076646063	1
0.195650593	1
0.254827775	1
0.042875598	1
0.299014896	1
0.246695106	1
0.252706484	1
0.259870538	1
0.094671529	1
0.109506961	1
0.331246733	1
0.102723606	1
0.343973223	1
0.126094733	1
0.145934908	1
0.143630858	1
0.150585403	1
0.092189557	1
0.149262822	1
0.08528444	1
0.215939236	1
0.362001814	1
0.138688106	1
0.201505348	1
0.195330475	1
0.243809243	1
0.381564348	1
0.211491337	1
0.28699284	1
0.118615358	1
0.078663746	1
0.168338332	1
0.338192628	1
0.132454386	1
0.26507567	1
0.285671898	1
0.17926169	1
0.191780936	1
0.199289179	1
0.215081755	1
0.240397758	1
0.240991891	1
0.070342242	1
0.136564922	1
0.298689737	1
0.169604642	1
0.224295269	1
0.124641682	1
0.186937595	1
0.270757116	1
0.143144186	1
0.167360412	1
0.131517486	1
0.255707538	1
0.104749602	1
0.117875418	1
0.220017556	1
0.289614935	1
0.09153388	1
0.129840189	1
0.166802821	1
0.101908754	1
0.057281012	1
0.104793251	1
0.132620632	1
0.04918878	1
0.082538856	1
0.218816792	1
0.177693935	1
0.235127308	1
0.228118108	1
0.23603999	1
0.152222317	1
0.26876064	1
0.113250099	1
0.179111917	1
0.264502109	1
0.104630335	1
0.093072528	1
0.093816834	1
0.236815765	1
0.077582494	1
0.256332299	1
0.378446168	1
0.402748534	1
0.205733475	1
0.236977773	1
0.178229499	1
0.081777474	1
0.172815375	1
0.274273152	1
0.306112434	1
0.150475339	1
0.235760026	1
0.022552753	1
0.311662761	1
0.124686181	1
0.164064732	1
0.38599014	1
0.269623474	1
0.080422077	1
0.278766928	1
0.098968913	1
0.364135605	1
0.186226101	1
0.115649677	1
0.050633301	1
0.072194489	1
0.239345956	1
0.188446814	1
0.597294361	1
0.261759349	1
0.317213073	1
0.235680679	1
0.056435429	1
0.107764266	1
0.135491657	1
0.077291074	1
0.206910799	1
0.195539896	1
0.269680821	1
0.267849489	1
0.083650528	1
0.2373924	1
0.149960504	1
0.235155376	1
0.177478673	1
0.332468455	1
0.063877855	1
0.269544101	1
0.106400729	1
0.137931014	1
0.322248372	1
0.255546558	1
0.053339158	1
0.06302111	1
0.120064958	1
0.281384391	1
0.177640822	1
0.313557584	1
0.22569554	1
0.137789842	1
0.106870236	1
0.141621982	1
0.134397976	1
0.123326862	1
0.103468765	1
0.052335275	1
0.301415053	1
0.205724699	1
0.073172084	1
0.077451319	1
0.053120611	1
0.169937727	1
0.190446596	1
0.215783844	1
0.245049103	1
0.305834599	1
0.099336868	1
0.165730855	1
0.243496682	1
0.077042848	1
0.079368825	1
0.419812418	1
0.314870576	1
0.124643349	1
0.353531953	1
0.072976048	1
0.213234938	1
0.257756663	1
0.143477184	1
0.27108752	1
0.100023534	1
0.150330156	1
0.231285032	1
0.152161995	1
0.26461438	1
0.166417875	1
0.292514271	1
0.087307169	1
0.072708498	1
0.225665934	1
0.135591969	1
0.089674179	1
0.263259764	1
0.306325314	1
0.255219407	1
0.197704391	1
0.201147496	1
0.26826412	1
0.221142953	1
0.172599852	1
0.260337833	1
0.082407071	1
0.20416264	1
0.201426827	1
0.388669635	1
0.400004485	1
0.133054558	1
0.437279525	1
0.306945539	1
0.246189812	1
0.266689845	1
0.242373309	1
0.120239971	1
0.259046524	1
0.185554706	1
0.131707539	1
0.250933815	1
0.290721275	1
0.0936372	1
0.255101216	1
0.27984927	1
0.197228973	1
0.155699909	1
0.192297267	1
0.393404922	1
0.127672116	1
0.079362075	1
0.107997853	1
0.126979907	1
0.047516597	1
0.385820874	1
0.144093058	1
0.325943033	1
0.404038983	1
0.298194956	1
0.077975061	1
0.287883593	1
0.195357143	1
0.323522022	1
0.193179299	1
0.174282646	1
0.249559036	1
0.294766932	1
0.144031481	1
0.434744213	1
0.125519444	1
0.159977558	1
0.138614472	1
0.122081978	1
0.141980569	1
0.11065705	1
0.087703844	1
0.124630334	1
0.182254185	1
0.177561847	1
0.102843092	1
0.161021296	1
0.103260554	1
0.095240992	1
0.039469234	1
0.124249956	1
0.163489652	1
0.07217272	1
0.203039347	1
0.335537967	1
0.173789036	1
0.176963444	1
0.172070639	1
0.106647285	1
0.069751097	1
0.473010544	1
0.189210939	1
0.200126802	1
0.244918207	1
0.209619604	1
0.261173584	1
0.072472033	1
0.129086774	1
0.24744782	1
0.184445293	1
0.181033703	1
0.079597952	1
0.118098924	1
0.106604859	1
0.116994248	1
0.528135139	1
0.217042124	1
0.09182781	1
0.105380403	1
0.161701826	1
0.252610279	1
0.136362945	1
0.465710732	1
0.228975434	1
0.092090473	1
0.165555639	1
0.172576286	1
0.086534944	1
0.374694887	1
0.222898957	1
0.065969152	1
0.198328952	1
0.275608551	1
0.172416396	1
0.294099809	1
0.373646106	1
0.358208986	1
0.09918431	1
0.373883652	1
0.296239421	1
0.217739194	1
0.35549857	1
0.171823484	1
0.071166614	1
0.212822572	1
0.296270846	1
0.115035852	1
0.127817673	1
0.076932517	1
0.202737307	1
0.244400756	1
0.094356746	1
0.065783196	1
0.259092265	1
0.099495139	1
0.160516039	1
0.176932712	1
0.094041359	1
0.285367303	1
0.086018731	1
0.239025131	1
0.128384893	1
0.473084338	1
0.143633344	1
0.096699809	1
0.167411377	1
0.289726986	1
0.134370455	1
0.375796557	1
0.106530886	1
0.116207274	1
0.19274614	1
0.253062693	1
0.274201734	1
0.097982146	1
0.319713231	1
0.36688238	1
0.215226558	1
0.033812221	1
0.386806178	1
0.388334227	1
0.200432002	1
0.214256848	1
0.208308238	1
0.396935145	1
0.374378592	1
0.222842314	1
0.089628798	1
0.270252152	1
0.182791949	1
0.115584869	1
0.211656616	1
0.274496525	1
0.22107947	1
0.179427497	1
0.427819128	1
0.200029654	1
0.068248904	1
0.131333888	1
0.118175881	1
0.168402956	1
0.199384878	1
0.278390048	1
0.383934403	1
0.269026644	1
0.253995291	1
0.19730994	1
0.338005458	1
0.084303367	1
0.276225649	1
0.050151409	1
0.139973272	1
0.060925956	1
0.084273429	1
0.13071605	1
0.213274828	1
0.259779086	1
0.277638587	1
0.252595551	1
0.04775791	1
0.151343891	1
0.020876416	1
0.216402686	1
0.08657538	1
0.077729314	1
0.23582988	1
0.111152864	1
0.112488822	1
0.348469399	1
0.190914865	1
0.164438897	1
0.339899702	1
0.051956591	1
0.183888589	1
0.121252524	1
0.084750673	1
0.11890257	1
0.250191251	1
0.073954146	1
0.149235245	1
0.257177289	1
0.199367491	1
0.164779986	1
0.240904329	1
0.102373331	1
0.249878452	1
0.13356941	1
0.219596232	1
0.072777893	1
0.11233244	1
0.12087326	1
0.170979442	1
0.082334193	1
0.123949752	1
0.224377888	1
0.092107064	1
0.2461267	1
0.125576092	1
0.218097935	1
0.169146591	1
0.136188258	1
0.044346024	1
0.048523474	1
0.377157992	1
0.400805249	1
0.223354289	1
0.092006256	1
0.329262356	1
0.233084892	1
0.348646159	1
0.347095311	1
0.201179341	1
0.168095526	1
0.187437152	1
0.292723781	1
0.437407565	1
0.161769165	1
0.237113094	1
0.036676244	1
0.273711022	1
0.495843189	1
0.334362234	1
0.123946941	1
0.322853528	1
0.166855574	1
0.179670729	1
0.22526794	1
0.203852475	1
0.233396513	1
0.22401267	1
0.222493892	1
0.276143523	1
0.099348434	1
0.051279547	1
0.34817154	1
0.118324314	1
0.263382209	1
0.089994505	1
0.087331431	1
0.327163455	1
0.09030956	1
0.269447393	1
0.486382609	1
0.185882386	1
0.263789011	1
0.173670324	1
0.08372035	1
0.341690573	1
0.187150832	1
0.063404054	1
0.117712528	1
0.321649971	1
0.291936525	1
0.255106492	1
0.163124894	1
0.041595732	1
0.027859177	1
0.08484156	1
0.203348951	1
0.153387611	1
0.14556376	1
0.466308623	1
0.178699367	1
0.070568304	1
0.288755371	1
0.158023299	1
0.267151629	1
0.257300219	1
0.194416492	1
0.385129621	1
0.135774726	1
0.15709224	1
0.194909873	1
0.091772348	1
0.17668952	1
0.171900615	1
0.318268185	1
0.204026848	1
0.361686377	1
0.226242893	1
0.143084694	1
0.168074597	1
0.248840359	1
0.375828531	1
0.226515515	1
0.20345718	1
0.139896791	1
0.095514112	1
0.187662763	1
0.202729518	1
0.309479226	1
0.095221553	1
0.161274581	1
0.270905826	1
0.40351785	1
0.188057547	1
0.307272965	1
0.16645938	1
0.197472909	1
0.199970018	1
0.279423379	1
0.273454016	1
0.247505953	1
0.162437858	1
0.181515844	2
0.280650711	2
0.297759129	2
0.262640056	2
0.112110427	2
0.138191669	2
0.327715542	2
0.058324581	2
0.258562042	2
0.274472003	2
0.34799847	2
0.426188236	2
0.169738336	2
0.086803612	2
0.090353676	2
0.201223081	2
0.174888639	2
0.144912237	2
0.09955451	2
0.201562596	2
0.278766929	2
0.16761253	2
0.39243329	2
0.262585344	2
0.263831179	2
0.194897093	2
0.281032751	2
0.283968173	2
0.11293972	2
0.134904659	2
0.191774164	2
0.113671055	2
0.339603376	2
0.127860311	2
0.162086992	2
0.107536925	2
0.19034347	2
0.222502796	2
0.270544882	2
0.066527001	2
0.204582285	2
0.067765998	2
0.209596527	2
0.181065801	2
0.279634114	2
0.3610438	2
0.167272673	2
0.122138604	2
0.105173106	2
0.137895216	2
0.114212434	2
0.244274159	2
0.15444724	2
0.087803856	2
0.266427284	2
0.267335844	2
0.172564622	2
0.237163805	2
0.103298479	2
0.337963038	2
0.176676295	2
0.217789186	2
0.149423522	2
0.311753633	2
0.297105451	2
0.194675226	2
0.303555479	2
0.166304314	2
0.18680428	2
0.186207517	2
0.118773506	2
0.149407217	2
0.288424767	2
0.159338017	2
0.1747695	2
0.012544614	2
0.193743246	2
0.169483464	2
0.250552135	2
0.21349685	2
0.134164274	2
0.114436319	2
0.172689799	2
0.202501046	2
0.192335672	2
0.143285964	2
0.235491613	2
0.160947443	2
0.207817273	2
0.270538767	2
0.214704607	2
0.080351868	2
0.432000816	2
0.173388598	2
0.052921273	2
0.133204205	2
0.172207134	2
0.076689403	2
0.231385822	2
0.140264331	2
0.093585255	2
0.218711717	2
0.100413927	2
0.07238477	2
0.11544524	2
0.144129673	2
0.186679181	2
0.086928588	2
0.246419442	2
0.267791577	2
0.119513061	2
0.10791294	2
0.055448442	2
0.367453213	2
0.177184631	2
0.173954673	2
0.192281713	2
0.230726201	2
0.133933344	2
0.187730474	2
0.238122951	2
0.145912342	2
0.207581696	2
0.130066375	2
0.383998915	2
0.2685795	2
0.226813618	2
0.095152144	2
0.135978848	2
0.321201545	2
0.127299896	2
0.307398633	2
0.102213985	2
0.078711446	2
0.152217199	2
0.251911079	2
0.14145142	2
0.030881987	2
0.141120038	2
0.220828908	2
0.302630866	2
0.079466856	2
0.248445793	2
0.105278507	2
0.316548495	2
0.43885835	2
0.081734602	2
0.181605013	2
0.193380036	2
0.039375803	2
0.125476305	2
0.249052684	2
0.142125272	2
0.300828735	2
0.275171841	2
0.148907964	2
0.119510638	2
0.4164737	2
0.198233662	2
0.10068354	2
0.266573081	2
0.197890604	2
0.071776056	2
0.22960488	2
0.069639451	2
0.381552842	2
0.261274987	2
0.279446784	2
0.198482207	2
0.253895256	2
0.086562612	2
0.236561507	2
0.09725021	2
0.30203246	2
0.20651789	2
0.252499696	2
0.040537076	2
0.1857895	2
0.27950942	2
0.090074724	2
0.231573742	2
0.078303233	2
0.27381978	2
0.322035165	2
0.280080944	2
0.089450227	2
0.272476164	2
0.374660754	2
0.265355154	2
0.181397242	2
0.054921676	2
0.132188655	2
0.336817682	2
0.213453784	2
0.437281163	2
0.211562834	2
0.057748261	2
0.167126353	2
0.339906773	2
0.146879113	2
0.234496712	2
0.334107822	2
0.197356851	2
0.144954361	2
0.427025643	2
0.091618861	2
0.319661445	2
0.359189	2
0.227835239	2
0.140904477	2
0.282042205	2
0.393653318	2
0.318880377	2
0.238527573	2
0.238936394	2
0.193243223	2
0.318424877	2
0.136079593	2
0.152530248	2
0.169161476	2
0.040686778	2
0.203810359	2
0.073261991	2
0.298156005	2
0.234299385	2
0.21665858	2
0.160264956	2
0.055644426	2
0.149785158	2
0.272747178	2
0.10126886	2
0.125184884	2
0.159587761	2
0.107618902	2
0.247611868	2
0.258908005	2
0.348302508	2
0.472796493	2
0.164994297	2
0.163380177	2
0.127134138	2
0.120866062	2
0.380179564	2
0.168173204	2
0.222169535	2
0.240610166	2
0.167024842	2
0.402184086	2
0.237549232	2
0.296116765	2
0.163189421	2
0.234224795	2
0.37451527	2
0.159662826	2
0.128603689	2
0.120042663	2
0.091666914	2
0.267737297	2
0.185734615	2
0.102414039	2
0.266603031	2
0.252663205	2
0.399236524	2
0.227090398	2
0.134858129	2
0.263407409	2
0.421180032	2
0.152548251	2
0.138260437	2
0.141392508	2
0.364367653	2
0.303877658	2
0.016668361	2
0.103411977	2
0.19885591	2
0.112412156	2
0.347685292	2
0.084980488	2
0.102170414	2
0.312287361	2
0.085923828	2
0.120443344	2
0.271076416	2
0.125945161	2
0.27151069	2
0.306717613	2
0.445415263	2
0.252722484	2
0.120720876	2
0.239951677	2
0.179749384	2
0.082511707	2
0.115431611	2
0.426576845	2
0.204660555	2
0.267094504	2
0.161174971	2
0.106860055	2
0.345508385	2
0.205297908	2
0.11057355	2
0.228999862	2
0.064057917	2
0.313515591	2
0.183978685	2
0.2758095	2
0.087640002	2
0.232088838	2
0.143544649	2
0.232862729	2
0.093765235	2
0.216195703	2
0.622844078	2
0.199043259	2
0.189220179	2
0.101131639	2
0.183969285	2
0.0612716	2
0.347197166	2
0.204795058	2
0.297469232	2
0.583606792	2
0.134152332	2
0.157984839	2
0.279928467	2
0.098290438	2
0.135019047	2
0.089027683	2
0.255800386	2
0.079201169	2
0.165949402	2
0.111629215	2
0.269300496	2
0.106590041	2
0.359133651	2
0.102361438	2
0.189818517	2
0.075883056	2
0.310949145	2
0.174303299	2
0.237129698	2
0.364679514	2
0.335013378	2
0.182001044	2
0.298193956	2
0.125158145	2
0.039503808	2
0.235229915	2
0.339724815	2
0.349302208	2
0.196320529	2
0.29205646	2
0.052571395	2
[truncated: 3,613 more rows]
