# Supplementary material for: Robust cone-mediated signaling persists late into rod photoreceptor degeneration
Source: eLife. 2022 Aug 30;11:e80271. doi: 10.7554/eLife.80271 (PMC9560159; doi:10.7554/eLife.80271)
Supplement: Figure 8—source data 1. [file elife-80271-fig8-data1.csv]

spikerate	info	index	genotype	months	.
23.66666667	16.63371749	1	WT	0
21	21.7951823	2	WT	0
8.666666667	13.51788799	7	WT	0
12.55555556	15.75083236	30	WT	0
15.22222222	24.32010666	44	WT	0
24	26.90465246	71	WT	0
12.11111111	14.28338705	72	WT	0
57.11111111	48.17788265	74	WT	0
13.22222222	15.57281548	76	WT	0
24.33333333	31.68086696	106	WT	0
22.77777778	12.98788477	150	WT	0
18	11.58085859	151	WT	0
23.11111111	30.84854935	153	WT	0
10.77777778	13.7717991	154	WT	0
59.88888889	38.9058869	171	WT	0
34.33333333	35.86670334	173	WT	0
8.555555556	14.20643321	184	WT	0
18.44444444	15.92120551	186	WT	0
13.33333333	12.08822944	188	WT	0
33.33333333	20.78736061	199	WT	0
12	12.10321732	216	WT	0
9.555555556	17.78730321	222	WT	0
8.555555556	12.42507753	246	WT	0
40.22222222	12.52099522	255	WT	0
33.66666667	36.93629279	258	WT	0
18.77777778	18.03191275	272	WT	0
16.66666667	11.73200983	277	WT	0
42.88888889	44.34690837	287	WT	0
18	21.41836772	289	WT	0
68.22222222	43.8207247	293	WT	0
27.44444444	17.36141341	312	WT	0
41.55555556	40.64161039	319	WT	0
14	16.30229721	326	WT	0
17.44444444	14.50962123	330	WT	0
22.77777778	13.73976329	331	WT	0
31.44444444	32.80119595	333	WT	0
59.88888889	40.79997944	337	WT	0
7.222222222	12.79638153	342	WT	0
10.44444444	16.29126232	343	WT	0
49.66666667	50.4863894	344	WT	0
60	44.97308941	345	WT	0
27.88888889	37.21050699	346	WT	0
13	17.60188725	357	WT	0
7	14.13576657	360	WT	0
6.888888889	12.07177194	375	WT	0
35	35.47003364	381	WT	0
14.77777778	23.09295473	396	WT	0
61.55555556	52.40588168	422	WT	0
35.77777778	45.49700198	424	WT	0
48.33333333	45.44066132	435	WT	0
24.77777778	24.43526895	436	WT	0
16	16.52787938	437	WT	0
9.333333333	15.44678241	469	WT	0
50	46.73186566	472	WT	0
33	37.37987262	475	WT	0
19.55555556	21.3641425	484	WT	0
12.88888889	11.90627498	492	WT	0
19.66666667	17.11980033	572	WT	0
32.22222222	28.92193586	579	WT	0
27.66666667	31.64418047	45	WT	0
10.66666667	19.80435169	104	WT	0
36	35.32895455	107	WT	0
12.44444444	18.01378398	108	WT	0
22.33333333	24.90339955	109	WT	0
38	45.37157619	117	WT	0
25.22222222	31.28576097	123	WT	0
20.66666667	22.68312844	124	WT	0
37.77777778	44.39860569	126	WT	0
28.11111111	32.69240933	128	WT	0
14	21.81209434	134	WT	0
26.88888889	28.01804867	135	WT	0
38.33333333	31.0725542	136	WT	0
19.44444444	19.64792063	140	WT	0
21	24.90784482	156	WT	0
9.888888889	16.39640566	164	WT	0
25.66666667	28.32962403	165	WT	0
25.11111111	26.98452297	171	WT	0
20	22.32069595	172	WT	0
22.44444444	25.27175222	173	WT	0
22.77777778	34.3201028	192	WT	0
42.55555556	48.93170344	200	WT	0
32.44444444	32.47583691	220	WT	0
25.33333333	31.77001441	223	WT	0
25	37.56678682	224	WT	0
12.44444444	17.00597783	231	WT	0
15.22222222	22.61010007	241	WT	0
34.11111111	42.52471704	243	WT	0
9	16.44570795	260	WT	0
31.22222222	33.60375264	267	WT	0
33.33333333	33.83337375	268	WT	0
20.55555556	23.65924544	279	WT	0
28.44444444	37.52654798	284	WT	0
35.11111111	44.45935426	287	WT	0
26.22222222	37.96660506	297	WT	0
20.22222222	27.02424927	320	WT	0
33.33333333	18.76395125	367	WT	0
14.33333333	23.63114205	377	WT	0
54.33333333	46.57362613	378	WT	0
16.33333333	26.87247267	385	WT	0
27.33333333	37.45565367	391	WT	0
22.77777778	22.46621113	415	WT	0
13.55555556	16.89311425	416	WT	0
11.33333333	19.53609229	435	WT	0
19.55555556	28.19894445	445	WT	0
30.66666667	39.00785925	448	WT	0
14.44444444	23.61695417	461	WT	0
13.22222222	17.83253125	463	WT	0
26.44444444	24.23238348	19	WT	0
25	20.75236762	20	WT	0
48.33333333	36.74507576	145	WT	0
7.333333333	9.06521415	149	WT	0
19.22222222	20.49663495	152	WT	0
19.88888889	18.23219175	153	WT	0
19.11111111	28.55509634	165	WT	0
3.333333333	8.800046427	169	WT	0
4.888888889	7.605790809	171	WT	0
26.33333333	24.04104879	173	WT	0
31.77777778	23.92352251	174	WT	0
8.111111111	16.30215044	202	WT	0
41.88888889	39.23336844	222	WT	0
5.666666667	8.617462796	223	WT	0
4.333333333	6.450315028	227	WT	0
12.55555556	17.47765457	230	WT	0
17	11.89864938	247	WT	0
23.66666667	21.7178422	251	WT	0
14.88888889	12.51863125	253	WT	0
16.33333333	13.67905587	254	WT	0
9.666666667	16.91899669	257	WT	0
13.22222222	19.20078613	273	WT	0
5.111111111	8.320368184	274	WT	0
25	14.40120515	321	WT	0
6	11.73464964	322	WT	0
6.888888889	8.63449581	325	WT	0
6.444444444	8.861969062	334	WT	0
20.22222222	25.1825878	344	WT	0
5	6.638642824	348	WT	0
18.66666667	14.87689817	349	WT	0
4.777777778	6.50226884	350	WT	0
14.22222222	19.63001471	353	WT	0
7	9.991845116	354	WT	0
26.11111111	35.08166579	361	WT	0
12.33333333	7.866277688	369	WT	0
15.22222222	16.19683164	372	WT	0
3.888888889	9.344598087	388	WT	0
6	10.42572994	397	WT	0
13.11111111	23.57116311	412	WT	0
7.777777778	11.16814798	414	WT	0
51.33333333	44.10872133	422	WT	0
6.555555556	8.340547258	427	WT	0
5.777777778	10.61253549	430	WT	0
45.77777778	46.52265698	433	WT	0
11.22222222	4.747740962	51	Degenerative	1
38.88888889	5.435096471	53	Degenerative	1
11.55555556	7.392196491	69	Degenerative	1
25.55555556	4.941497003	71	Degenerative	1
3.222222222	4.614398624	103	Degenerative	1
22.22222222	5.006492251	106	Degenerative	1
31.88888889	5.666286248	110	Degenerative	1
11.55555556	10.51794022	140	Degenerative	1
7.777777778	6.778221553	141	Degenerative	1
3.111111111	5.173637223	142	Degenerative	1
11.11111111	5.227490764	143	Degenerative	1
15.55555556	8.980572652	155	Degenerative	1
27	5.167514018	167	Degenerative	1
4.888888889	4.923908733	170	Degenerative	1
9.333333333	5.053585465	180	Degenerative	1
5.111111111	5.002978341	183	Degenerative	1
5.444444444	5.555548771	189	Degenerative	1
3	4.876366922	195	Degenerative	1
21.55555556	5.608842775	212	Degenerative	1
8.222222222	7.800185885	213	Degenerative	1
4.333333333	4.929584006	214	Degenerative	1
8.888888889	7.239796352	216	Degenerative	1
16.88888889	4.995473872	218	Degenerative	1
20	5.099373663	226	Degenerative	1
19.77777778	6.298756232	234	Degenerative	1
10.55555556	4.50383211	239	Degenerative	1
16.44444444	6.594677487	248	Degenerative	1
29	4.506855783	255	Degenerative	1
9.888888889	7.729484104	256	Degenerative	1
31.44444444	4.994426793	259	Degenerative	1
5.888888889	5.00428825	273	Degenerative	1
27.44444444	7.023033831	278	Degenerative	1
7.111111111	4.948495554	287	Degenerative	1
27.88888889	8.49870018	334	Degenerative	1
41.55555556	9.664805438	337	Degenerative	1
8.333333333	5.592535626	344	Degenerative	1
5.777777778	4.708881752	354	Degenerative	1
21.77777778	7.390069993	366	Degenerative	1
14.22222222	6.438586265	371	Degenerative	1
24.55555556	6.517440494	372	Degenerative	1
8	6.363688735	377	Degenerative	1
29.55555556	7.193956562	396	Degenerative	1
13.11111111	6.182440722	401	Degenerative	1
16.88888889	5.457356463	405	Degenerative	1
16.22222222	5.332302229	417	Degenerative	1
4.777777778	8.565500132	418	Degenerative	1
13.22222222	6.03536772	420	Degenerative	1
13.66666667	4.61108688	422	Degenerative	1
31	8.472548174	424	Degenerative	1
13.22222222	9.985724642	425	Degenerative	1
3	5.530136889	426	Degenerative	1
7.444444444	7.520881322	441	Degenerative	1
5.777777778	5.20914817	454	Degenerative	1
13.33333333	7.469287547	522	Degenerative	1
14.11111111	14.60084977	59	Degenerative	1
11.33333333	10.76114545	62	Degenerative	1
12.22222222	17.2807212	64	Degenerative	1
17.44444444	14.61810991	83	Degenerative	1
24.33333333	9.58847648	85	Degenerative	1
12.22222222	14.39619135	88	Degenerative	1
13.44444444	14.28225123	102	Degenerative	1
8.444444444	14.35841179	152	Degenerative	1
18.88888889	15.25440133	162	Degenerative	1
14.22222222	13.04726635	178	Degenerative	1
14.33333333	19.65982659	190	Degenerative	1
18	15.42495524	197	Degenerative	1
5.555555556	9.595995209	217	Degenerative	1
13.33333333	15.61443966	239	Degenerative	1
5.333333333	11.48213859	284	Degenerative	1
54.22222222	15.37796579	288	Degenerative	1
6.888888889	11.10188281	298	Degenerative	1
10	13.01202568	303	Degenerative	1
12.88888889	14.65813136	322	Degenerative	1
21	17.4967096	323	Degenerative	1
35.33333333	11.40897401	327	Degenerative	1
11.11111111	15.53098106	328	Degenerative	1
16.77777778	16.26434228	330	Degenerative	1
12.44444444	16.07298524	335	Degenerative	1
5.777777778	10.78377605	338	Degenerative	1
7.222222222	11.51415712	344	Degenerative	1
4.333333333	9.579073135	349	Degenerative	1
18.22222222	19.26735341	358	Degenerative	1
23.11111111	16.59652762	364	Degenerative	1
15.44444444	17.47725248	376	Degenerative	1
10.11111111	16.9038727	377	Degenerative	1
17.66666667	19.9993608	378	Degenerative	1
21.55555556	15.50674265	379	Degenerative	1
24	19.84990504	380	Degenerative	1
24.44444444	15.28908075	382	Degenerative	1
21	15.02934793	396	Degenerative	1
7	10.195367	397	Degenerative	1
11.66666667	10.57009449	398	Degenerative	1
13.55555556	17.20340385	402	Degenerative	1
4.666666667	10.54645871	425	Degenerative	1
18.55555556	11.74962978	427	Degenerative	1
6.666666667	12.25665601	437	Degenerative	1
7.777777778	11.49177743	444	Degenerative	1
11.11111111	13.68122963	450	Degenerative	1
18.55555556	23.93133742	455	Degenerative	1
14.33333333	15.72341786	462	Degenerative	1
11	11.65518392	500	Degenerative	1
12.77777778	14.45204289	501	Degenerative	1
11.66666667	14.60961774	504	Degenerative	1
20.33333333	10.74555174	505	Degenerative	1
12.66666667	13.41877741	512	Degenerative	1
19	9.950006683	517	Degenerative	1
8.777777778	9.889304665	520	Degenerative	1
16.33333333	10.96868654	521	Degenerative	1
30.66666667	22.72659413	21	Degenerative	1
30.33333333	25.35428786	38	Degenerative	1
21.33333333	14.19376563	53	Degenerative	1
32.22222222	22.98788448	82	Degenerative	1
13.88888889	13.3362303	84	Degenerative	1
34.77777778	22.70902504	98	Degenerative	1
46.11111111	30.30722404	109	Degenerative	1
18.22222222	17.50060289	112	Degenerative	1
13	14.26946817	116	Degenerative	1
21.66666667	13.70367563	123	Degenerative	1
13	12.84712853	124	Degenerative	1
44.77777778	32.08299783	132	Degenerative	1
53	28.56102632	142	Degenerative	1
5.444444444	12.09582695	143	Degenerative	1
29.33333333	25.89795986	160	Degenerative	1
29.77777778	14.81804637	189	Degenerative	1
46.55555556	30.82795649	194	Degenerative	1
5.333333333	11.90934414	202	Degenerative	1
48	27.45263287	211	Degenerative	1
17.77777778	16.88055344	223	Degenerative	1
18	13.11713609	227	Degenerative	1
26.66666667	25.83770113	238	Degenerative	1
7	14.13441617	257	Degenerative	1
19	12.7747079	258	Degenerative	1
31.55555556	16.12610797	259	Degenerative	1
42.22222222	18.52054221	262	Degenerative	1
30.88888889	23.07840774	272	Degenerative	1
43	30.27462838	273	Degenerative	1
42.55555556	29.93841027	278	Degenerative	1
48.66666667	35.24637014	280	Degenerative	1
44.44444444	28.90174082	298	Degenerative	1
25.77777778	19.44729848	307	Degenerative	1
10	16.78732263	315	Degenerative	1
9.444444444	12.1347909	331	Degenerative	1
17.11111111	15.46578591	333	Degenerative	1
4.888888889	11.40734206	335	Degenerative	1
19.88888889	14.85269926	341	Degenerative	1
19.77777778	13.13562647	342	Degenerative	1
33.77777778	20.57360419	350	Degenerative	1
30.33333333	13.06530116	352	Degenerative	1
46.33333333	27.69089649	418	Degenerative	1
48.66666667	30.33967399	435	Degenerative	1
12.88888889	16.11276443	436	Degenerative	1
10.55555556	12.83549689	437	Degenerative	1
12.22222222	12.94734093	471	Degenerative	1
13.88888889	13.14950702	477	Degenerative	1
14	21.85335927	481	Degenerative	1
10	11.73406874	486	Degenerative	1
14	18.51026005	487	Degenerative	1
50	27.46647281	492	Degenerative	1
27	24.01363023	508	Degenerative	1
47.44444444	31.93956329	527	Degenerative	1
10.66666667	16.13985319	528	Degenerative	1
55.44444444	38.91551655	530	Degenerative	1
51.88888889	39.6052511	557	Degenerative	1
17.66666667	16.79254713	559	Degenerative	1
37.44444444	29.08367093	563	Degenerative	1
9.888888889	10.17783236	68	Degenerative	2
20.66666667	6.090997591	78	Degenerative	2
4.333333333	5.634783712	89	Degenerative	2
43	10.44969266	90	Degenerative	2
15.88888889	7.512604635	92	Degenerative	2
4.222222222	6.379573485	101	Degenerative	2
31.55555556	9.77553747	103	Degenerative	2
8.777777778	5.791810877	111	Degenerative	2
25.33333333	9.422347467	114	Degenerative	2
13.11111111	10.48294255	119	Degenerative	2
3.333333333	6.190794212	120	Degenerative	2
7.555555556	8.231612217	122	Degenerative	2
8.555555556	5.63256295	130	Degenerative	2
31.22222222	6.072708311	131	Degenerative	2
13	6.584170968	132	Degenerative	2
6.222222222	6.126857527	133	Degenerative	2
14.44444444	14.84534412	134	Degenerative	2
17.66666667	9.809864757	135	Degenerative	2
8.444444444	7.545953646	147	Degenerative	2
4.444444444	6.721005402	167	Degenerative	2
2.888888889	5.826805987	176	Degenerative	2
4.333333333	5.912714682	270	Degenerative	2
46.66666667	11.28933747	294	Degenerative	2
23	8.844032716	295	Degenerative	2
17.44444444	11.83579697	301	Degenerative	2
21.44444444	10.22201135	302	Degenerative	2
10.88888889	10.89249192	304	Degenerative	2
3.222222222	6.314714247	305	Degenerative	2
23.44444444	11.51797169	306	Degenerative	2
4.777777778	6.285453818	313	Degenerative	2
2.888888889	5.844967787	316	Degenerative	2
34.22222222	16.12317349	319	Degenerative	2
27.66666667	13.52177809	324	Degenerative	2
27.55555556	14.91197184	340	Degenerative	2
9.444444444	9.142330859	349	Degenerative	2
6.666666667	7.172952678	350	Degenerative	2
5.222222222	12.68249345	372	Degenerative	2
23.22222222	7.372018584	376	Degenerative	2
13.77777778	6.602765442	388	Degenerative	2
22.77777778	13.58062913	83	Degenerative	2
46.33333333	19.18738221	107	Degenerative	2
17.11111111	16.04833497	118	Degenerative	2
29.11111111	19.92576096	121	Degenerative	2
9.666666667	16.37214984	123	Degenerative	2
20.33333333	17.59351638	141	Degenerative	2
12.66666667	18.88021697	142	Degenerative	2
9	14.38974518	145	Degenerative	2
42.77777778	32.82564316	146	Degenerative	2
36.77777778	23.97877294	154	Degenerative	2
32.44444444	15.39899359	166	Degenerative	2
30.88888889	23.05797243	173	Degenerative	2
6.444444444	13.93140063	176	Degenerative	2
13.44444444	18.58325434	179	Degenerative	2
10.55555556	13.99676897	180	Degenerative	2
14	16.17981764	186	Degenerative	2
51.11111111	20.69007418	187	Degenerative	2
36.44444444	27.53596245	190	Degenerative	2
8.666666667	16.98560352	192	Degenerative	2
24.77777778	16.94127559	203	Degenerative	2
19.88888889	16.50751274	205	Degenerative	2
35.11111111	23.0580859	206	Degenerative	2
25	17.29412028	211	Degenerative	2
12.11111111	16.5556095	214	Degenerative	2
34.33333333	16.92132688	226	Degenerative	2
21.44444444	15.51304381	230	Degenerative	2
9	13.60014994	232	Degenerative	2
34	22.33578587	234	Degenerative	2
12.66666667	14.61437123	239	Degenerative	2
7.555555556	14.64046529	245	Degenerative	2
25.55555556	20.3133531	248	Degenerative	2
18.66666667	15.03603588	264	Degenerative	2
22.77777778	17.43937467	269	Degenerative	2
24.44444444	16.73633648	271	Degenerative	2
25.33333333	16.72268522	276	Degenerative	2
16.66666667	13.58557503	283	Degenerative	2
33.22222222	19.79741501	285	Degenerative	2
14.88888889	15.38584023	290	Degenerative	2
34.11111111	17.45982573	292	Degenerative	2
19.33333333	15.93224709	296	Degenerative	2
21.88888889	17.97685998	300	Degenerative	2
17.33333333	16.51887281	306	Degenerative	2
23.22222222	16.10260591	309	Degenerative	2
25.11111111	15.33976908	317	Degenerative	2
17.88888889	17.71238537	318	Degenerative	2
21	15.44695197	323	Degenerative	2
23.77777778	14.53456216	333	Degenerative	2
26.33333333	15.84104505	366	Degenerative	2
19	21.23590858	395	Degenerative	2
21.44444444	8.385719425	12	Degenerative	2
9.777777778	7.60441004	23	Degenerative	2
15.44444444	7.90624759	32	Degenerative	2
31.88888889	9.314159217	33	Degenerative	2
36.11111111	18.99256532	43	Degenerative	2
16.33333333	8.25904857	46	Degenerative	2
19	9.694346902	91	Degenerative	2
13.44444444	8.291877712	96	Degenerative	2
42.88888889	15.68478038	102	Degenerative	2
29.44444444	19.55717339	110	Degenerative	2
17.55555556	19.79048318	111	Degenerative	2
18.22222222	16.54313717	119	Degenerative	2
5.111111111	7.86519907	125	Degenerative	2
4.222222222	9.831473551	137	Degenerative	2
9.111111111	13.05573006	149	Degenerative	2
11.77777778	11.10011821	151	Degenerative	2
6.555555556	11.35628625	152	Degenerative	2
7	11.65568351	160	Degenerative	2
24.44444444	19.63538151	161	Degenerative	2
62.33333333	31.5177633	162	Degenerative	2
20.22222222	18.00565919	170	Degenerative	2
5.777777778	7.699172957	171	Degenerative	2
9.888888889	11.06117221	174	Degenerative	2
8.666666667	10.81195744	176	Degenerative	2
14.77777778	12.17020626	189	Degenerative	2
57.66666667	20.90166706	208	Degenerative	2
4.111111111	8.42825041	247	Degenerative	2
37.55555556	10.53140953	248	Degenerative	2
29.33333333	24.80511006	262	Degenerative	2
11.11111111	10.84755317	268	Degenerative	2
66.22222222	32.82479692	315	Degenerative	2
8.555555556	8.90636932	316	Degenerative	2
30.55555556	24.38644322	324	Degenerative	2
8.666666667	9.129049076	325	Degenerative	2
3.444444444	7.297712063	331	Degenerative	2
4.888888889	7.114055617	342	Degenerative	2
17.11111111	16.53984027	359	Degenerative	2
42.66666667	13.00029511	373	Degenerative	2
9.333333333	8.788724704	375	Degenerative	2
20.33333333	16.15208918	387	Degenerative	2
29.44444444	12.13821999	389	Degenerative	2
30.33333333	18.29280329	390	Degenerative	2
39.55555556	13.67438332	400	Degenerative	2
4.777777778	8.68448921	404	Degenerative	2
42.44444444	16.9005828	406	Degenerative	2
68.44444444	26.42860114	413	Degenerative	2
3.333333333	7.115833343	415	Degenerative	2
21.11111111	17.35200093	419	Degenerative	2
4.333333333	8.417996365	420	Degenerative	2
22.55555556	17.74876773	431	Degenerative	2
23.77777778	17.65839973	442	Degenerative	2
10.44444444	7.182868687	452	Degenerative	2
4.666666667	8.404177892	459	Degenerative	2
8	8.890648126	460	Degenerative	2
9.888888889	8.065550918	486	Degenerative	2
20.11111111	24.00439076	494	Degenerative	2
7	8.243036749	495	Degenerative	2
27.33333333	17.02977608	540	Degenerative	2
3.777777778	7.998312404	545	Degenerative	2
16.55555556	13.87599582	12	Degenerative	3
6	10.48773286	53	Degenerative	3
2.444444444	5.082803861	114	Degenerative	3
9.222222222	13.01575517	135	Degenerative	3
4	7.080175019	145	Degenerative	3
33.88888889	7.101612226	158	Degenerative	3
14	17.23044304	181	Degenerative	3
16	5.536600106	218	Degenerative	3
8.222222222	5.272154086	226	Degenerative	3
7.111111111	5.624629768	227	Degenerative	3
18.33333333	15.05611857	244	Degenerative	3
25.77777778	7.878626347	256	Degenerative	3
22.55555556	9.519166996	257	Degenerative	3
11.44444444	9.280826668	263	Degenerative	3
36.33333333	18.21790815	264	Degenerative	3
5.444444444	5.429392227	265	Degenerative	3
3.444444444	6.132672192	269	Degenerative	3
2.777777778	5.533413405	273	Degenerative	3
8.888888889	8.101973046	284	Degenerative	3
6	7.234271561	294	Degenerative	3
17.66666667	13.36430374	301	Degenerative	3
10.66666667	6.195821118	310	Degenerative	3
9.333333333	7.200837098	313	Degenerative	3
18.33333333	15.67281774	320	Degenerative	3
35.44444444	11.98209693	327	Degenerative	3
7.666666667	7.265703216	346	Degenerative	3
10	9.804420662	348	Degenerative	3
15	12.15272964	352	Degenerative	3
4.555555556	5.452192007	356	Degenerative	3
3.333333333	5.174063695	357	Degenerative	3
38.66666667	22.35629014	361	Degenerative	3
4.555555556	9.509149633	369	Degenerative	3
14.33333333	11.67677009	393	Degenerative	3
7.666666667	6.969937384	406	Degenerative	3
2.888888889	6.337566252	420	Degenerative	3
46.77777778	23.01615739	422	Degenerative	3
8.888888889	9.133952085	425	Degenerative	3
8	9.58025485	435	Degenerative	3
4.666666667	5.1205922	441	Degenerative	3
2.111111111	5.283955114	442	Degenerative	3
6.555555556	7.554554615	450	Degenerative	3
3	6.611589702	453	Degenerative	3
2.555555556	5.656734251	458	Degenerative	3
6.222222222	11.79150906	461	Degenerative	3
2.333333333	5.294306355	466	Degenerative	3
14.33333333	14.30096492	471	Degenerative	3
5.777777778	8.177105587	479	Degenerative	3
19.88888889	11.22241489	481	Degenerative	3
14.44444444	13.16823846	485	Degenerative	3
33.77777778	26.78594108	487	Degenerative	3
3.333333333	5.853116282	533	Degenerative	3
27	23.9679244	538	Degenerative	3
18.77777778	18.5776275	539	Degenerative	3
30.11111111	18.4592606	549	Degenerative	3
6.555555556	7.73375202	553	Degenerative	3
17.55555556	13.86225547	563	Degenerative	3
22.11111111	20.81454363	564	Degenerative	3
22.55555556	13.77076442	566	Degenerative	3
16.66666667	6.842540378	613	Degenerative	3
3.111111111	5.376693898	618	Degenerative	3
11	6.082292101	619	Degenerative	3
18.55555556	7.220659493	621	Degenerative	3
6.666666667	5.352630733	622	Degenerative	3
35.11111111	7.479830197	624	Degenerative	3
20	13.58679813	635	Degenerative	3
18.44444444	11.45508182	636	Degenerative	3
14.66666667	11.87777371	666	Degenerative	3
6.111111111	5.064155183	667	Degenerative	3
17	13.68470067	675	Degenerative	3
15.66666667	11.44203854	676	Degenerative	3
12.77777778	5.332625616	677	Degenerative	3
11.22222222	12.50216627	12	Degenerative	3
28	22.46029398	15	Degenerative	3
11.88888889	14.28196059	37	Degenerative	3
8.111111111	12.7340497	41	Degenerative	3
12.66666667	12.98149347	46	Degenerative	3
10.88888889	14.29558317	49	Degenerative	3
17.77777778	17.82368878	54	Degenerative	3
9.111111111	12.70038016	65	Degenerative	3
20.88888889	18.89275742	107	Degenerative	3
21.66666667	14.77795021	115	Degenerative	3
11.33333333	13.14962145	116	Degenerative	3
40.11111111	12.95867785	118	Degenerative	3
15.44444444	16.79569875	123	Degenerative	3
20.66666667	19.47417868	126	Degenerative	3
28.11111111	21.64127496	148	Degenerative	3
10.77777778	13.01889903	150	Degenerative	3
14.44444444	14.76429108	182	Degenerative	3
15.88888889	15.34041193	194	Degenerative	3
15.55555556	12.29549179	197	Degenerative	3
19.33333333	18.84096779	198	Degenerative	3
10.44444444	13.06517004	201	Degenerative	3
27.11111111	21.71232851	206	Degenerative	3
22.44444444	16.34984314	208	Degenerative	3
22.44444444	20.1316624	209	Degenerative	3
28.88888889	21.08854634	210	Degenerative	3
14.33333333	12.9002399	214	Degenerative	3
11.66666667	15.24930694	215	Degenerative	3
17.33333333	16.57026435	216	Degenerative	3
17.33333333	13.03150503	217	Degenerative	3
22.44444444	22.00166729	222	Degenerative	3
9.777777778	12.57795156	223	Degenerative	3
11.55555556	13.35533873	225	Degenerative	3
14.55555556	12.28513222	230	Degenerative	3
19.66666667	13.99848414	232	Degenerative	3
14.33333333	12.7370441	256	Degenerative	3
9.333333333	12.04962473	276	Degenerative	3
4	12.20892088	286	Degenerative	3
11.33333333	12.79053249	298	Degenerative	3
22.22222222	16.95665403	300	Degenerative	3
10.11111111	13.70424859	304	Degenerative	3
20.33333333	12.61240413	322	Degenerative	3
15.11111111	12.34587543	327	Degenerative	3
21.22222222	16.59037586	330	Degenerative	3
9.777777778	12.63716279	357	Degenerative	3
10	12.28958661	360	Degenerative	3
14	14.24615663	362	Degenerative	3
18.22222222	15.49168969	371	Degenerative	3
9.666666667	12.94141499	375	Degenerative	3
16.11111111	16.37211198	381	Degenerative	3
21.88888889	18.10020552	417	Degenerative	3
16.77777778	8.49112884	14	Degenerative	4
11.22222222	8.935329034	25	Degenerative	4
22.66666667	7.881049005	41	Degenerative	4
25	11.36451429	42	Degenerative	4
6.666666667	8.468609717	57	Degenerative	4
7.333333333	6.567180512	61	Degenerative	4
11.55555556	8.467024101	71	Degenerative	4
17.22222222	6.99383588	104	Degenerative	4
27.66666667	10.04259085	109	Degenerative	4
7.777777778	7.01424953	115	Degenerative	4
9.444444444	6.554441995	121	Degenerative	4
12.11111111	9.405005429	125	Degenerative	4
30.77777778	10.7679709	159	Degenerative	4
9	7.434982744	205	Degenerative	4
16.44444444	8.93348768	213	Degenerative	4
10.66666667	8.324156263	215	Degenerative	4
16.66666667	9.568577968	225	Degenerative	4
10.55555556	7.709932601	234	Degenerative	4
18	11.08315905	243	Degenerative	4
12.66666667	7.252155456	255	Degenerative	4
21.77777778	10.26845791	257	Degenerative	4
22.22222222	14.69605942	258	Degenerative	4
7.333333333	8.147598765	275	Degenerative	4
20.55555556	13.6166489	276	Degenerative	4
18.77777778	8.293324246	279	Degenerative	4
14	9.432942178	284	Degenerative	4
7	7.640975878	288	Degenerative	4
23.66666667	15.78038071	291	Degenerative	4
5.777777778	6.64250569	292	Degenerative	4
16.33333333	7.191608927	298	Degenerative	4
5.444444444	6.622884322	305	Degenerative	4
25.33333333	10.24201564	306	Degenerative	4
11.88888889	7.917160949	315	Degenerative	4
5.111111111	6.626580183	319	Degenerative	4
20.44444444	9.77613037	323	Degenerative	4
21	7.607429169	326	Degenerative	4
21.77777778	12.78920625	327	Degenerative	4
17.77777778	7.56488763	352	Degenerative	4
7.777777778	7.172156863	383	Degenerative	4
27.44444444	6.40976687	12	Degenerative	4
19.55555556	3.582204296	23	Degenerative	4
33.88888889	7.984243887	27	Degenerative	4
7.333333333	4.009665156	35	Degenerative	4
7.888888889	3.63605451	56	Degenerative	4
36.33333333	6.901457838	65	Degenerative	4
41.44444444	6.386787285	71	Degenerative	4
11.77777778	5.550491879	75	Degenerative	4
7	4.174723552	81	Degenerative	4
26.22222222	5.519099637	91	Degenerative	4
15.55555556	4.242874629	109	Degenerative	4
32	6.971958714	111	Degenerative	4
29.11111111	6.353535795	112	Degenerative	4
11.77777778	3.699038093	117	Degenerative	4
16.11111111	6.03281841	118	Degenerative	4
29.33333333	7.262424699	123	Degenerative	4
15.77777778	3.738508357	131	Degenerative	4
39	8.369648553	142	Degenerative	4
29.11111111	6.091606803	167	Degenerative	4
25.55555556	5.819414931	173	Degenerative	4
27.44444444	5.822086526	182	Degenerative	4
25.55555556	5.738521106	191	Degenerative	4
24.44444444	5.85084936	195	Degenerative	4
26.22222222	5.574418666	222	Degenerative	4
23.55555556	5.015561725	229	Degenerative	4
36.55555556	8.783408306	244	Degenerative	4
16.22222222	2.938741464	86	Degenerative	5
16	5.476297373	98	Degenerative	5
7.777777778	4.167503107	99	Degenerative	5
9.333333333	2.999342073	101	Degenerative	5
7.444444444	2.500432861	109	Degenerative	5
2.444444444	2.492577668	110	Degenerative	5
4.222222222	2.20696407	114	Degenerative	5
7.777777778	2.507963077	116	Degenerative	5
13	4.646989814	117	Degenerative	5
4.666666667	2.168777431	118	Degenerative	5
5	3.685363463	120	Degenerative	5
6	4.083727767	121	Degenerative	5
2.111111111	2.595334588	122	Degenerative	5
16.11111111	2.407069799	155	Degenerative	5
6.444444444	2.260302046	156	Degenerative	5
6.777777778	2.139116572	196	Degenerative	5
7.333333333	2.263325525	197	Degenerative	5
19.66666667	4.91727	207	Degenerative	5
12.44444444	2.666049231	217	Degenerative	5
2	2.371750307	221	Degenerative	5
14.55555556	5.755966307	237	Degenerative	5
5.666666667	2.066832927	242	Degenerative	5
8.111111111	2.355096585	243	Degenerative	5
32.88888889	8.328269467	252	Degenerative	5
3.111111111	2.803181187	260	Degenerative	5
19.55555556	2.95902442	265	Degenerative	5
3.333333333	2.683493804	266	Degenerative	5
28.66666667	2.960671715	268	Degenerative	5
43	7.461363289	32	Degenerative	5
34.77777778	5.402355352	39	Degenerative	5
32.11111111	6.669539064	58	Degenerative	5
45.33333333	7.2000721	71	Degenerative	5
39	6.474700787	99	Degenerative	5
22.55555556	5.424431309	147	Degenerative	5
36.44444444	8.155882684	161	Degenerative	5
41.11111111	8.252225935	164	Degenerative	5
22.33333333	5.765594132	174	Degenerative	5
39.66666667	6.069900193	190	Degenerative	5
20.33333333	5.197418869	197	Degenerative	5
53.11111111	8.483536872	202	Degenerative	5
38.88888889	6.720305637	207	Degenerative	5
38.11111111	5.95641709	213	Degenerative	5
35.66666667	7.338034894	232	Degenerative	5
48	7.908835296	236	Degenerative	5
38.55555556	7.263354135	252	Degenerative	5
26.77777778	5.311555037	275	Degenerative	5
41.44444444	6.745541848	281	Degenerative	5
39.77777778	8.595263214	283	Degenerative	5
40.33333333	8.29344723	327	Degenerative	5
30.22222222	5.239826866	351	Degenerative	5
12.66666667	7.000947836	375	Degenerative	5
5.888888889	11.46222184	378	Degenerative	5
5	7.202171818	380	Degenerative	5
13.11111111	7.522268731	382	Degenerative	5
18.55555556	5.360940326	388	Degenerative	5
31.66666667	13.33639701	390	Degenerative	5
35.22222222	9.497648784	391	Degenerative	5
9.222222222	10.16741357	398	Degenerative	5
5.444444444	6.163054165	399	Degenerative	5
12.22222222	5.434930765	401	Degenerative	5
14.66666667	5.252186358	404	Degenerative	5
25.11111111	18.68352401	410	Degenerative	5
6.555555556	6.619876946	414	Degenerative	5
5	6.797711371	415	Degenerative	5
29.88888889	7.87775436	417	Degenerative	5
38.44444444	13.36878972	418	Degenerative	5
7.888888889	14.65807014	420	Degenerative	5
30.11111111	14.56421856	426	Degenerative	5
7.333333333	7.422943841	431	Degenerative	5
34.88888889	5.726728554	432	Degenerative	5
10.44444444	6.265239114	435	Degenerative	5
3.666666667	6.869449812	444	Degenerative	5
5.333333333	7.73106214	445	Degenerative	5
4	5.717733624	446	Degenerative	5
30.55555556	9.299655531	452	Degenerative	5
20.22222222	10.45660448	453	Degenerative	5
15.77777778	5.887407442	461	Degenerative	5
7.333333333	10.867892	1	Degenerative	5
13.44444444	12.42095235	2	Degenerative	5
21.88888889	12.02420569	21	Degenerative	5
21.88888889	9.618708742	244	Degenerative	5
23.44444444	10.79775866	255	Degenerative	5
21.77777778	19.04097022	325	Degenerative	5
14.22222222	10.53662983	336	Degenerative	5
11	11.4237046	343	Degenerative	5
10.22222222	10.79164783	356	Degenerative	5
17.55555556	10.46673143	365	Degenerative	5
9.333333333	10.62189122	384	Degenerative	5
11.22222222	9.718940281	386	Degenerative	5
12.22222222	12.54000789	391	Degenerative	5
13.66666667	10.76844845	396	Degenerative	5
10.22222222	13.27622495	397	Degenerative	5
10.11111111	9.089906557	398	Degenerative	5
32.33333333	22.55258667	399	Degenerative	5
12.66666667	14.94486814	400	Degenerative	5
18.44444444	11.7699313	401	Degenerative	5
11.55555556	11.62710711	402	Degenerative	5
23.44444444	14.44842291	403	Degenerative	5
21.88888889	13.85358113	406	Degenerative	5
24.44444444	21.70789755	407	Degenerative	5
9.333333333	13.64528437	410	Degenerative	5
17.88888889	14.52013907	411	Degenerative	5
17.55555556	9.580804274	413	Degenerative	5
13.44444444	14.1657367	414	Degenerative	5
26	10.99055309	419	Degenerative	5
11.88888889	10.53530883	420	Degenerative	5
20.55555556	17.40878268	421	Degenerative	5
10.11111111	12.58290722	426	Degenerative	5
17.88888889	12.86501405	427	Degenerative	5
9.111111111	10.75861005	429	Degenerative	5
6.888888889	9.098222948	430	Degenerative	5
33.77777778	23.08302343	435	Degenerative	5
18.66666667	13.79969558	436	Degenerative	5
13.33333333	14.23578234	438	Degenerative	5
10	13.88999599	460	Degenerative	5
9.555555556	12.0109406	462	Degenerative	5
9.777777778	12.29258637	465	Degenerative	5
9.555555556	12.63321792	466	Degenerative	5
11.11111111	14.50180169	482	Degenerative	5
11	15.41031443	486	Degenerative	5
6.777777778	10.41262248	496	Degenerative	5
20	14.63948003	508	Degenerative	5
20.66666667	19.82641965	511	Degenerative	5
15.33333333	12.11347886	512	Degenerative	5
9.777777778	14.20218206	515	Degenerative	5
16.11111111	11.03242461	522	Degenerative	5
20.55555556	17.56766703	524	Degenerative	5
20.66666667	18.8416033	525	Degenerative	5
11.11111111	10.37673982	532	Degenerative	5
7.888888889	12.07423679	539	Degenerative	5
18.22222222	12.89614452	540	Degenerative	5
19.33333333	13.57534758	541	Degenerative	5
23.55555556	5.541685361	2	Degenerative	7
9.666666667	5.334358098	23	Degenerative	7
27.33333333	5.439053731	27	Degenerative	7
15	5.32081764	41	Degenerative	7
17.77777778	6.152634849	52	Degenerative	7
13.88888889	6.893707521	53	Degenerative	7
17.88888889	5.533153058	56	Degenerative	7
22.77777778	7.183926814	59	Degenerative	7
30.66666667	5.45534393	87	Degenerative	7
31.66666667	6.074843342	107	Degenerative	7
16.33333333	6.782520303	111	Degenerative	7
39.33333333	8.00298201	122	Degenerative	7
31	5.228263527	132	Degenerative	7
21.22222222	6.722979028	141	Degenerative	7
16.44444444	6.890397526	146	Degenerative	7
18.44444444	8.18382431	150	Degenerative	7
35.55555556	6.875295852	155	Degenerative	7
16.77777778	5.321223265	161	Degenerative	7
30	5.220583357	177	Degenerative	7
47	8.083889626	209	Degenerative	7
19.55555556	5.104929398	219	Degenerative	7
32.55555556	5.131902599	224	Degenerative	7
11	5.43086138	236	Degenerative	7
18.33333333	5.600385222	237	Degenerative	7
35.88888889	5.794462647	250	Degenerative	7
29.55555556	6.478040142	259	Degenerative	7
30.11111111	41.29775307	2	WT	0
8.111111111	17.05271971	4	WT	0
27.11111111	31.87023983	14	WT	0
33.11111111	36.18771554	19	WT	0
27.22222222	37.01100255	20	WT	0
40.33333333	44.98741795	21	WT	0
15.11111111	20.62162813	47	WT	0
14.44444444	21.04304168	48	WT	0
19.33333333	27.2374764	69	WT	0
23	36.09520902	71	WT	0
43.22222222	51.97135042	132	WT	0
21.33333333	27.84312764	140	WT	0
28.22222222	30.9884337	151	WT	0
23.22222222	25.27249337	152	WT	0
33.55555556	41.72019932	153	WT	0
20.88888889	26.63468052	161	WT	0
40.55555556	46.67286721	172	WT	0
34.22222222	44.54620596	174	WT	0
20.66666667	27.55909611	178	WT	0
12.55555556	16.67051757	179	WT	0
10.88888889	20.94107609	181	WT	0
9.222222222	17.78676999	196	WT	0
40.88888889	49.32283949	207	WT	0
31.11111111	42.05679133	208	WT	0
26.88888889	30.56799422	213	WT	0
34.22222222	41.74029167	238	WT	0
39.77777778	46.11611091	248	WT	0
29.77777778	37.19974308	252	WT	0
28.11111111	37.44067719	279	WT	0
43.66666667	47.13924161	283	WT	0
30.55555556	42.51136094	285	WT	0
38.66666667	46.97876911	293	WT	0
10.22222222	21.28417161	306	WT	0
43.55555556	52.41931647	343	WT	0
8	19.23545427	367	WT	0
18.88888889	22.56732662	371	WT	0
20.77777778	27.96792531	373	WT	0
39.44444444	44.56833071	379	WT	0
28.33333333	36.80003516	388	WT	0
33.88888889	43.78561172	413	WT	0
37.55555556	50.02719508	416	WT	0
31	28.17664787	423	WT	0
12.66666667	22.44109778	430	WT	0
35.55555556	11.90245431	3	Degenerative	4
49.88888889	16.19614419	11	Degenerative	4
20.66666667	11.95001038	31	Degenerative	4
28.11111111	12.38587473	32	Degenerative	4
22.77777778	11.48008638	59	Degenerative	4
12.11111111	12.14206986	68	Degenerative	4
23.66666667	12.26610247	72	Degenerative	4
15.88888889	11.82248633	85	Degenerative	4
27.88888889	14.0559832	86	Degenerative	4
29.11111111	13.14216077	91	Degenerative	4
33	13.38524664	103	Degenerative	4
18.22222222	12.89422712	171	Degenerative	4
30.22222222	11.7194748	182	Degenerative	4
17.44444444	12.18056693	183	Degenerative	4
41.66666667	14.26179332	185	Degenerative	4
27.22222222	13.74604894	190	Degenerative	4
24.33333333	15.33001813	192	Degenerative	4
38.11111111	17.74020475	197	Degenerative	4
17.22222222	11.08268602	203	Degenerative	4
18.55555556	12.32732998	214	Degenerative	4
30.33333333	13.44517407	215	Degenerative	4
42.77777778	21.72842349	226	Degenerative	4
17.66666667	12.00020712	255	Degenerative	4
19.33333333	13.73042222	266	Degenerative	4
40.11111111	19.37786828	269	Degenerative	4
19.44444444	13.77801489	274	Degenerative	4
27.22222222	13.21048528	276	Degenerative	4
20.11111111	12.61411616	288	Degenerative	4
26.66666667	16.76339298	295	Degenerative	4
38.77777778	18.40305014	300	Degenerative	4
38.33333333	15.8613449	304	Degenerative	4
24.77777778	15.10629713	310	Degenerative	4
9.111111111	11.95765646	318	Degenerative	4
19.55555556	13.69970018	324	Degenerative	4
21.77777778	13.12136354	326	Degenerative	4
28.55555556	12.60941665	346	Degenerative	4
19.88888889	12.89303236	348	Degenerative	4
24.11111111	4.110820427	80	Degenerative	3
27.22222222	4.277332891	113	Degenerative	3
8.444444444	4.289794194	118	Degenerative	3
5	3.895282022	122	Degenerative	3
27.11111111	5.042041561	130	Degenerative	3
48.88888889	7.147332852	152	Degenerative	3
13	9.702910998	153	Degenerative	3
8.222222222	3.926642961	170	Degenerative	3
5.111111111	3.988674995	172	Degenerative	3
7	4.875503607	179	Degenerative	3
61.11111111	7.766340016	180	Degenerative	3
43.55555556	6.277619699	181	Degenerative	3
6.777777778	4.651607401	183	Degenerative	3
4.111111111	4.526649526	201	Degenerative	3
40.66666667	8.757433497	207	Degenerative	3
7.333333333	5.641528152	208	Degenerative	3
39.55555556	9.275240371	211	Degenerative	3
7.666666667	5.186808932	216	Degenerative	3
36.11111111	5.257589453	222	Degenerative	3
12.33333333	8.183397826	224	Degenerative	3
28	6.621067725	227	Degenerative	3
5.222222222	4.281016849	233	Degenerative	3
36.55555556	4.576447669	252	Degenerative	3
10.22222222	7.981925809	272	Degenerative	3
3.888888889	4.261670788	276	Degenerative	3
37.22222222	4.959455954	279	Degenerative	3
27.22222222	5.770496194	280	Degenerative	3
17.33333333	4.191970024	297	Degenerative	3
4.222222222	3.929957701	298	Degenerative	3
30.88888889	6.490126456	299	Degenerative	3
4.111111111	4.571151313	7	Degenerative	7
19.55555556	4.939845598	23	Degenerative	7
27	4.933734421	41	Degenerative	7
25.77777778	4.739325982	52	Degenerative	7
30.11111111	4.593368919	62	Degenerative	7
15.22222222	4.214632751	79	Degenerative	7
8.333333333	4.004955521	80	Degenerative	7
10.88888889	4.049721321	84	Degenerative	7
17	5.118214738	88	Degenerative	7
35.22222222	5.218827817	118	Degenerative	7
30.22222222	4.887428405	121	Degenerative	7
15.11111111	4.303175031	125	Degenerative	7
23.22222222	4.28956359	136	Degenerative	7
20.11111111	4.213286717	139	Degenerative	7
28.44444444	4.171962278	144	Degenerative	7
23.66666667	4.79154292	154	Degenerative	7
4.111111111	4.65951677	157	Degenerative	7
