# Supplementary material for: Robust cone-mediated signaling persists late into rod photoreceptor degeneration
Source: eLife. 2022 Aug 30;11:e80271. doi: 10.7554/eLife.80271 (PMC9560159; doi:10.7554/eLife.80271)
Supplement: Figure 11—source data 1. [file elife-80271-fig11-data1.csv]

info	num_trials	trial_length	condition	.
26.38019716	20	10	WT
27.72690052	20	10	WT
27.86586615	20	10	WT
35.38840137	20	10	WT
25.20533599	20	10	WT
27.71257357	20	10	WT
32.5219829	20	10	WT
30.02431482	20	10	WT
26.13922384	20	10	WT
24.46610584	30	10	WT
29.4205091	30	10	WT
26.59783334	30	10	WT
21.08404991	30	10	WT
27.87635617	30	10	WT
21.97209482	30	10	WT
28.44780598	30	10	WT
31.64567838	30	10	WT
23.59596397	30	10	WT
21.389519	40	10	WT
24.86402565	40	10	WT
30.46436689	40	10	WT
22.46621788	40	10	WT
20.15112101	40	10	WT
21.69803122	40	10	WT
22.7269502	40	10	WT
28.1299779	40	10	WT
27.25514207	40	10	WT
31.83801113	40	10	WT
28.9798523	40	10	WT
30.04727928	50	10	WT
21.22299377	50	10	WT
18.75295444	50	10	WT
30.2411623	50	10	WT
24.1924226	50	10	WT
29.18539721	50	10	WT
23.85811792	50	10	WT
29.7943391	50	10	WT
23.39401993	50	10	WT
23.70787274	50	10	WT
21.34249266	50	10	WT
19.48537306	50	10	WT
27.19146578	50	10	WT
26.04024585	50	10	WT
22.1070724	50	10	WT
22.69219418	50	10	WT
24.7280557	60	10	WT
27.32153659	60	10	WT
29.2765078	60	10	WT
18.16039327	60	10	WT
28.39481464	60	10	WT
18.38026855	60	10	WT
21.49482009	60	10	WT
24.71411568	60	10	WT
26.40474942	60	10	WT
24.2934256	60	10	WT
21.27002981	60	10	WT
28.33121985	60	10	WT
21.63340823	60	10	WT
28.5807489	60	10	WT
21.23734609	60	10	WT
28.429414	60	10	WT
21.04533987	60	10	WT
23.97687159	60	10	WT
23.38769425	60	10	WT
19.89785728	70	10	WT
25.21684167	70	10	WT
23.96518889	70	10	WT
24.86284846	70	10	WT
23.42063056	70	10	WT
29.72283363	70	10	WT
21.39642907	70	10	WT
22.49268853	70	10	WT
26.02119129	70	10	WT
24.8865957	70	10	WT
20.99089268	70	10	WT
28.45045196	70	10	WT
22.06133387	70	10	WT
24.00279214	70	10	WT
20.89916896	70	10	WT
26.44642124	70	10	WT
29.3578718	80	10	WT
25.81180756	80	10	WT
27.59481609	80	10	WT
26.34448079	80	10	WT
28.76806009	80	10	WT
25.60191793	80	10	WT
19.4551037	80	10	WT
16.55982853	80	10	WT
21.59567739	80	10	WT
24.73347418	80	10	WT
16.50132545	80	10	WT
27.83291317	90	10	WT
26.59567772	90	10	WT
17.07113492	90	10	WT
20.65500075	90	10	WT
20.66080446	90	10	WT
27.49781252	90	10	WT
28.56137147	90	10	WT
27.74945086	90	10	WT
23.22947523	90	10	WT
28.26913959	90	10	WT
27.5704284	90	10	WT
17.0104721	90	10	WT
23.07076589	90	10	WT
18.05241441	90	10	WT
21.20640905	90	10	WT
26.44866031	90	10	WT
20.27002936	100	10	WT
26.18808027	100	10	WT
20.0045213	100	10	WT
28.62068471	100	10	WT
21.07864611	100	10	WT
26.06161988	100	10	WT
21.62319084	100	10	WT
17.89749765	100	10	WT
21.79497564	100	10	WT
26.62880451	100	10	WT
26.80800565	100	10	WT
29.11089725	100	10	WT
28.50586236	100	10	WT
20.96185033	20	10	3M
24.75447258	20	10	3M
18.39126157	20	10	3M
19.73832829	20	10	3M
25.88608794	20	10	3M
30.29241082	20	10	3M
19.9000123	20	10	3M
19.37623845	20	10	3M
26.37034727	20	10	3M
26.09004571	20	10	3M
19.01618587	20	10	3M
20.27492829	20	10	3M
30.2801626	20	10	3M
30.04442023	20	10	3M
18.47216291	20	10	3M
25.23304169	20	10	3M
22.48898827	20	10	3M
28.33060257	20	10	3M
25.05788667	20	10	3M
20.53792286	20	10	3M
30.36346015	20	10	3M
24.87443815	30	10	3M
17.13602299	30	10	3M
26.14457861	30	10	3M
24.24899348	30	10	3M
18.80311496	30	10	3M
16.97226177	30	10	3M
26.20619291	30	10	3M
20.94128925	30	10	3M
21.37209298	30	10	3M
27.50063933	30	10	3M
24.1568336	30	10	3M
25.58160812	30	10	3M
19.66822006	30	10	3M
19.99541231	30	10	3M
27.28457935	30	10	3M
18.0877032	30	10	3M
21.66436427	30	10	3M
22.27629773	30	10	3M
18.9823634	30	10	3M
22.47644105	30	10	3M
20.24184328	40	10	3M
16.6384428	40	10	3M
27.4044041	40	10	3M
19.05357837	40	10	3M
20.01828969	40	10	3M
21.78944106	40	10	3M
20.58940822	40	10	3M
22.25291097	40	10	3M
20.23182722	40	10	3M
20.86273926	40	10	3M
21.79581434	40	10	3M
27.20565214	40	10	3M
19.69697243	40	10	3M
21.78570416	40	10	3M
21.64542324	40	10	3M
17.36229493	40	10	3M
24.88738757	40	10	3M
21.88206691	40	10	3M
26.32993659	40	10	3M
26.85963329	40	10	3M
18.19721896	40	10	3M
22.84297229	40	10	3M
17.76326035	40	10	3M
25.64351479	40	10	3M
17.24234782	40	10	3M
19.08715056	40	10	3M
16.73122342	40	10	3M
18.86551309	40	10	3M
19.26361412	50	10	3M
20.40841258	50	10	3M
17.22209401	50	10	3M
26.43577176	50	10	3M
15.87839095	50	10	3M
24.71044771	50	10	3M
24.98074551	50	10	3M
21.7228195	50	10	3M
20.6276604	50	10	3M
23.78583067	50	10	3M
25.63366849	50	10	3M
17.52178117	50	10	3M
21.92156128	50	10	3M
21.80797701	50	10	3M
21.33965649	50	10	3M
21.35498587	50	10	3M
20.17169933	50	10	3M
18.51231388	50	10	3M
24.15949184	60	10	3M
20.62669129	60	10	3M
25.99402751	60	10	3M
18.23272057	60	10	3M
17.19607619	60	10	3M
18.26458597	60	10	3M
19.86477517	60	10	3M
17.78425535	60	10	3M
18.42519072	60	10	3M
18.54993361	60	10	3M
25.91941905	60	10	3M
19.54818645	60	10	3M
24.44393898	60	10	3M
20.77020844	60	10	3M
16.59840753	70	10	3M
16.51955207	70	10	3M
23.12614364	70	10	3M
22.24797046	70	10	3M
22.27719538	70	10	3M
15.86994521	70	10	3M
24.02817339	70	10	3M
18.72459845	70	10	3M
22.71787597	70	10	3M
21.3956491	70	10	3M
22.94413858	70	10	3M
22.35854183	70	10	3M
24.7337584	70	10	3M
23.07761759	70	10	3M
25.8753615	70	10	3M
24.40764445	70	10	3M
15.86113711	70	10	3M
23.64045947	70	10	3M
16.18689549	70	10	3M
16.69592535	70	10	3M
15.5992044	70	10	3M
16.39374237	70	10	3M
16.17497517	70	10	3M
23.03479127	80	10	3M
21.85777029	80	10	3M
23.51657999	80	10	3M
17.39847351	80	10	3M
18.0531524	80	10	3M
25.11538459	80	10	3M
26.11704326	80	10	3M
16.52877415	80	10	3M
18.12525464	80	10	3M
22.36199849	80	10	3M
22.10503564	80	10	3M
19.44370928	80	10	3M
24.84182667	80	10	3M
17.4315741	80	10	3M
17.7314654	80	10	3M
23.88452817	80	10	3M
22.41708816	80	10	3M
23.67265304	80	10	3M
21.32331168	80	10	3M
19.61152768	80	10	3M
18.03160613	80	10	3M
16.35787116	90	10	3M
22.73467359	90	10	3M
25.72465167	90	10	3M
24.17373982	90	10	3M
17.38325208	90	10	3M
17.47903817	90	10	3M
22.51396801	90	10	3M
16.4166569	90	10	3M
23.3843663	90	10	3M
26.28007424	90	10	3M
22.57491038	90	10	3M
24.94671762	90	10	3M
19.63854931	90	10	3M
19.36096284	90	10	3M
20.22758021	90	10	3M
20.22447295	90	10	3M
15.71636909	90	10	3M
21.96019775	90	10	3M
19.59298922	90	10	3M
25.53870157	90	10	3M
19.96440856	90	10	3M
16.90233967	90	10	3M
16.26927811	100	10	3M
25.81162875	100	10	3M
25.44173046	100	10	3M
20.81487061	100	10	3M
24.01772664	100	10	3M
20.30451369	100	10	3M
18.39130672	100	10	3M
15.65183611	100	10	3M
19.3429131	100	10	3M
21.6376221	100	10	3M
25.4042144	100	10	3M
21.37777641	100	10	3M
21.72183518	100	10	3M
20.8924708	100	10	3M
19.41665647	100	10	3M
19.75180426	100	10	3M
23.0325456	100	10	3M
22.40159667	100	10	3M
22.00003317	100	10	3M
20.03632879	100	10	3M
16.02221639	100	10	3M
16.58717614	100	10	3M
17.51340668	100	10	3M
23.16152084	100	10	3M
15.02209428	20	10	5M
17.63569159	20	10	5M
23.09239838	20	10	5M
23.38143543	20	10	5M
24.68268655	20	10	5M
19.84354007	20	10	5M
24.05602966	20	10	5M
17.04286215	20	10	5M
23.05340857	20	10	5M
15.62927045	20	10	5M
16.48833596	20	10	5M
23.90476386	20	10	5M
24.83248232	20	10	5M
24.99593984	20	10	5M
24.58905149	20	10	5M
23.37907028	20	10	5M
24.07549213	20	10	5M
15.43179458	20	10	5M
18.28341297	20	10	5M
24.65803439	20	10	5M
16.83652935	20	10	5M
21.42783078	20	10	5M
17.0167681	30	10	5M
19.30836432	30	10	5M
19.22399751	30	10	5M
21.94763203	30	10	5M
21.34827785	30	10	5M
21.12625864	30	10	5M
18.87794993	30	10	5M
21.33977441	30	10	5M
17.75798438	30	10	5M
14.60283748	30	10	5M
15.15830168	30	10	5M
21.56670975	30	10	5M
15.96458421	30	10	5M
21.99404248	30	10	5M
21.9225627	30	10	5M
21.51051358	30	10	5M
20.61604048	30	10	5M
17.25072065	40	10	5M
16.19636358	40	10	5M
16.01398048	40	10	5M
15.26114121	40	10	5M
19.87883926	40	10	5M
18.47779911	40	10	5M
19.59411771	40	10	5M
17.24949068	40	10	5M
19.23267325	40	10	5M
19.9935708	40	10	5M
20.07661395	40	10	5M
17.09796737	40	10	5M
15.54782936	50	10	5M
16.04773748	50	10	5M
20.65390824	50	10	5M
19.10874864	50	10	5M
15.16425854	50	10	5M
17.23995543	50	10	5M
20.26951917	50	10	5M
19.5216463	50	10	5M
18.87681899	50	10	5M
15.61527366	50	10	5M
20.94477575	50	10	5M
19.0033738	50	10	5M
15.69106343	50	10	5M
20.76080742	50	10	5M
18.07235744	50	10	5M
20.48855737	50	10	5M
15.24927868	50	10	5M
16.61682828	50	10	5M
20.32515056	50	10	5M
16.07796874	50	10	5M
20.23174259	60	10	5M
16.29688527	60	10	5M
16.48302188	60	10	5M
19.96160035	60	10	5M
20.20805262	60	10	5M
16.61618852	60	10	5M
20.5670377	60	10	5M
17.95608198	60	10	5M
19.35808836	60	10	5M
17.07073804	60	10	5M
15.29681807	60	10	5M
18.30412234	70	10	5M
17.38166687	70	10	5M
19.54948201	70	10	5M
19.10118022	70	10	5M
19.54374163	70	10	5M
18.52622161	70	10	5M
19.38134387	70	10	5M
19.48624764	70	10	5M
19.62958506	70	10	5M
19.7997395	70	10	5M
18.55048014	70	10	5M
17.84540058	70	10	5M
16.69267636	70	10	5M
18.51296182	70	10	5M
19.68421518	70	10	5M
14.56454051	70	10	5M
17.0994398	70	10	5M
19.61264338	70	10	5M
18.88851532	80	10	5M
19.79853264	80	10	5M
17.24993992	80	10	5M
15.06551181	80	10	5M
19.62013674	80	10	5M
18.6034462	80	10	5M
19.14753196	80	10	5M
14.59102952	80	10	5M
18.03327559	80	10	5M
18.93475328	80	10	5M
18.29669408	80	10	5M
17.35262235	80	10	5M
20.63749589	90	10	5M
15.63454224	90	10	5M
17.28366181	90	10	5M
19.15737017	90	10	5M
17.25443918	90	10	5M
20.75065001	90	10	5M
16.22352939	90	10	5M
18.03078953	90	10	5M
18.24770836	90	10	5M
16.58455814	90	10	5M
15.66260745	90	10	5M
20.26271222	90	10	5M
16.89597486	90	10	5M
20.78121005	90	10	5M
14.18783063	100	10	5M
16.6841859	100	10	5M
19.30600758	100	10	5M
17.70659294	100	10	5M
19.27867967	100	10	5M
19.69678405	100	10	5M
19.79679618	100	10	5M
17.64840821	100	10	5M
17.99449147	100	10	5M
14.23715336	100	10	5M
18.68601704	100	10	5M
19.40759959	100	10	5M
15.19713028	100	10	5M
19.7999687	100	10	5M
19.17361987	100	10	5M
18.31625245	100	10	5M
14.29951072	100	10	5M
